# Supplementary material for: Multiple Epistasis Interactions Within MHC Are Associated With Ulcerative Colitis
Source: Front Genet. 2019 Apr 3;10:257. doi: 10.3389/fgene.2019.00257 (PMC6456704; doi:10.3389/fgene.2019.00257)
Supplement: Supplementary file 2 [file Data_Sheet_1.ZIP]

Archive with 9 entries (6 files):
- Supplemental_Data/
- Supplemental_Data/.DS_Store
- __MACOSX/
- __MACOSX/Supplemental_Data/
- __MACOSX/Supplemental_Data/._.DS_Store
- Supplemental_Data/CD_Discovery_2765_SNPs.csv
- Supplemental_Data/CD_Discovery_Independent_306_SNPs.csv
- Supplemental_Data/UC_Discovery_Independent_121_SNPs.csv
- Supplemental_Data/UC_Discovery_1123_SNPs.csv
