# Supplementary material for: Multiple Epistasis Interactions Within MHC Are Associated With Ulcerative Colitis
Source: Front Genet. 2019 Apr 3;10:257. doi: 10.3389/fgene.2019.00257 (PMC6456704; doi:10.3389/fgene.2019.00257)
Supplement: Supplementary file 2 [file Data_Sheet_1.ZIP › Supplemental_Data/CD_Discovery_2765_SNPs.csv]

CHR	SNP	BP
16	imm_16_49302700	49302700
16	imm_16_49305205	49305205
1	imm_1_67498692	67498692
1	imm_1_67480743	67480743
16	imm_16_49302125	49302125
16	imm_16_49296951	49296951
16	imm_16_49296331	49296331
16	imm_16_49300439	49300439
1	imm_1_67452578	67452578
16	imm_16_49300182	49300182
1	imm_1_67503956	67503956
1	imm_1_67507948	67507948
1	imm_1_67508536	67508536
1	imm_1_67512759	67512759
1	imm_1_67443356	67443356
1	imm_1_67454257	67454257
1	imm_1_67442721	67442721
16	imm_16_49287730	49287730
16	imm_16_49288597	49288597
1	imm_1_67475114	67475114
16	imm_16_49297083	49297083
1	imm_1_67442222	67442222
1	imm_1_67469657	67469657
16	imm_16_49290875	49290875
1	imm_1_67448104	67448104
1	imm_1_67445353	67445353
1	imm_1_67448316	67448316
1	imm_1_67458186	67458186
1	imm_1_67442801	67442801
1	imm_1_67495155	67495155
1	imm_1_67497708	67497708
1	imm_1_67490116	67490116
1	rs2201841	67466790
1	imm_1_67469135	67469135
1	1-67468820-ATT-DELETION	67468820
1	imm_1_67467986	67467986
1	imm_1_67493685	67493685
1	1-67452531-T-INSERTION	67452531
1	imm_1_67437798	67437798
1	imm_1_67502643	67502643
1	imm_1_67441139	67441139
1	imm_1_67438131	67438131
1	imm_1_67437428	67437428
1	imm_1_67491717	67491717
1	imm_1_67503216	67503216
1	imm_1_67458031	67458031
16	imm_16_49314041	49314041
1	imm_1_67436742	67436742
1	imm_1_67459652	67459652
1	imm_1_67435210	67435210
1	imm_1_67465610	67465610
1	imm_1_67460937	67460937
1	imm_1_67507887	67507887
1	imm_1_67507070	67507070
1	imm_1_67512680	67512680
2	imm_2_233844429	233844429
1	imm_1_67525259	67525259
1	imm_1_67520024	67520024
2	imm_2_233825084	233825084
2	imm_2_233826187	233826187
2	imm_2_233826322	233826322
1	ccc-1-67517272-T-C	67517272
2	imm_2_233846587	233846587
2	imm_2_233823578	233823578
2	imm_2_233838242	233838242
2	imm_2_233826508	233826508
2	imm_2_233822427	233822427
2	imm_2_233833529	233833529
2	imm_2_233832620	233832620
2	imm_2_233846979	233846979
2	imm_2_233845149	233845149
2	imm_2_233818878	233818878
1	imm_1_67518356	67518356
2	imm_2_233848107	233848107
2	imm_2_233840445	233840445
2	imm_2_233831973	233831973
2	imm_2_233837585	233837585
2	imm_2_233848207	233848207
2	imm_2_233843192	233843192
2	imm_2_233871489	233871489
2	imm_2_233813122	233813122
2	imm_2_233871349	233871349
2	imm_2_233841348	233841348
2	imm_2_233849156	233849156
2	imm_2_233871243	233871243
2	imm_2_233871213	233871213
2	imm_2_233872997	233872997
2	imm_2_233848457	233848457
2	imm_2_233850738	233850738
2	imm_2_233837654	233837654
1	imm_1_67523062	67523062
1	imm_1_67462196	67462196
2	imm_2_233812669	233812669
5	5-40466815-T-INSERTION	40466815
2	imm_2_233814441	233814441
2	imm_2_233849691	233849691
2	imm_2_233813325	233813325
2	imm_2_233811914	233811914
1	imm_1_67537186	67537186
2	imm_2_233815770	233815770
2	imm_2_233821275	233821275
2	imm_2_233810357	233810357
2	imm_2_233811289	233811289
2	imm_2_233807787	233807787
2	imm_2_233810683	233810683
5	imm_5_40469309	40469309
5	imm_5_40473705	40473705
5	imm_5_40469333	40469333
5	imm_5_40446341	40446341
5	imm_5_40448223	40448223
5	imm_5_40468169	40468169
5	imm_5_40441887	40441887
5	imm_5_40447667	40447667
5	imm_5_40447952	40447952
5	imm_5_40434853	40434853
5	imm_5_40466940	40466940
5	imm_5_40441807	40441807
5	5-40466866-C-DELETION	40466866
5	imm_5_40447048	40447048
5	imm_5_40467421	40467421
5	imm_5_40450824	40450824
5	imm_5_40450746	40450746
5	imm_5_40450176	40450176
5	imm_5_40460734	40460734
5	imm_5_40462177	40462177
5	imm_5_40426861	40426861
5	imm_5_40460183	40460183
5	imm_5_40446692	40446692
5	imm_5_40448701	40448701
5	ccc-5-40420891-C-T	40420891
5	imm_5_40460947	40460947
1	imm_1_67519611	67519611
5	ccc-5-40450643-A-C	40450643
1	imm_1_67533953	67533953
1	imm_1_67520728	67520728
1	imm_1_67525941	67525941
5	imm_5_40359695	40359695
1	imm_1_67526096	67526096
5	imm_5_40359471	40359471
5	imm_5_40355763	40355763
1	imm_1_67388075	67388075
1	imm_1_67410592	67410592
1	imm_1_67376807	67376807
1	imm_1_67427735	67427735
1	imm_1_67424600	67424600
1	imm_1_67425598	67425598
1	imm_1_67428542	67428542
1	imm_1_67431542	67431542
1	imm_1_67408078	67408078
1	imm_1_67517189	67517189
1	imm_1_67431391	67431391
1	imm_1_67521656	67521656
1	imm_1_67372245	67372245
1	imm_1_67373720	67373720
16	imm_16_49385310	49385310
1	imm_1_67532728	67532728
1	imm_1_67523781	67523781
2	imm_2_233855479	233855479
5	imm_5_40465875	40465875
5	imm_5_40470793	40470793
1	imm_1_67377722	67377722
5	imm_5_40459597	40459597
5	imm_5_40467706	40467706
5	imm_5_40435298	40435298
5	imm_5_40434831	40434831
5	imm_5_40472369	40472369
5	imm_5_40438670	40438670
5	imm_5_40433157	40433157
5	imm_5_40447775	40447775
5	imm_5_40433109	40433109
5	imm_5_40466932	40466932
5	imm_5_40459216	40459216
5	imm_5_40448114	40448114
16	imm_16_49277244	49277244
5	imm_5_40473854	40473854
5	imm_5_40449187	40449187
5	5-40525152-A-DELETION	40525152
5	imm_5_40446496	40446496
5	imm_5_40432182	40432182
5	imm_5_40445800	40445800
5	imm_5_40468984	40468984
1	imm_1_67397897	67397897
5	imm_5_40427983	40427983
1	imm_1_67368960	67368960
5	imm_5_40493541	40493541
5	imm_5_40433947	40433947
1	imm_1_67380688	67380688
5	imm_5_40425609	40425609
5	imm_5_40438950	40438950
16	imm_16_49282694	49282694
5	imm_5_40428485	40428485
5	imm_5_40438434	40438434
5	imm_5_40437266	40437266
5	imm_5_40472455	40472455
5	imm_5_40425044	40425044
1	imm_1_67429272	67429272
5	imm_5_40411916	40411916
1	imm_1_67395886	67395886
5	5-40460131-A-DELETION	40460131
5	imm_5_40526366	40526366
5	imm_5_40522653	40522653
5	imm_5_40437990	40437990
5	imm_5_40526547	40526547
5	imm_5_40413623	40413623
1	imm_1_67404019	67404019
5	imm_5_40523027	40523027
10	imm_10_64108492	64108492
5	imm_5_40492385	40492385
1	imm_1_67396892	67396892
5	imm_5_40419818	40419818
1	imm_1_67433629	67433629
1	imm_1_67408538	67408538
5	imm_5_40512344	40512344
5	imm_5_40429958	40429958
5	imm_5_40494673	40494673
5	imm_5_40431143	40431143
5	imm_5_40422930	40422930
5	imm_5_40513537	40513537
1	imm_1_67408063	67408063
5	imm_5_40503029	40503029
5	imm_5_40420998	40420998
5	imm_5_40382448	40382448
5	imm_5_40383226	40383226
5	imm_5_40491002	40491002
5	imm_5_40499496	40499496
5	imm_5_40492409	40492409
5	imm_5_40495962	40495962
1	imm_1_67441558	67441558
5	imm_5_40499169	40499169
5	imm_5_40429609	40429609
5	imm_5_40427957	40427957
10	imm_10_64111210	64111210
5	imm_5_40494445	40494445
5	imm_5_40490831	40490831
5	imm_5_40494824	40494824
5	imm_5_40428141	40428141
5	imm_5_40481671	40481671
5	imm_5_40478626	40478626
5	imm_5_40491719	40491719
5	imm_5_40492628	40492628
5	imm_5_40422312	40422312
5	imm_5_40513272	40513272
5	imm_5_40493216	40493216
5	imm_5_40482914	40482914
5	imm_5_40479053	40479053
5	imm_5_40495506	40495506
5	imm_5_40491202	40491202
5	imm_5_40479401	40479401
5	imm_5_40478659	40478659
5	imm_5_40498183	40498183
1	imm_1_67402057	67402057
5	imm_5_40495072	40495072
5	imm_5_40368755	40368755
5	imm_5_40481438	40481438
5	imm_5_40429362	40429362
1	imm_1_67384201	67384201
5	imm_5_40524443	40524443
1	imm_1_67384360	67384360
16	imm_16_49272686	49272686
5	imm_5_40482862	40482862
16	imm_16_49262456	49262456
1	imm_1_67381935	67381935
5	imm_5_40518356	40518356
5	imm_5_40518283	40518283
2	imm_2_233810786	233810786
5	imm_5_40516963	40516963
1	imm_1_67379723	67379723
2	imm_2_233810710	233810710
5	imm_5_40515944	40515944
5	5-40481316-A-INSERTION	40481316
5	imm_5_40357238	40357238
16	imm_16_49387354	49387354
10	imm_10_64115570	64115570
1	imm_1_67439879	67439879
5	imm_5_40355634	40355634
5	imm_5_150225225	150225225
5	imm_5_150252645	150252645
2	imm_2_233900099	233900099
5	imm_5_150225917	150225917
5	imm_5_150155003	150155003
5	imm_5_150225452	150225452
5	imm_5_150241236	150241236
5	imm_5_150203840	150203840
5	imm_5_150226046	150226046
5	imm_5_150206779	150206779
5	imm_5_150209259	150209259
5	imm_5_150250244	150250244
5	imm_5_150237809	150237809
5	imm_5_150150076	150150076
5	imm_5_150239060	150239060
5	imm_5_150258539	150258539
5	imm_5_150237584	150237584
5	imm_5_150240024	150240024
5	imm_5_150239835	150239835
5	imm_5_150203915	150203915
5	imm_5_150208644	150208644
5	imm_5_150208511	150208511
5	imm_5_150258102	150258102
5	imm_5_150207092	150207092
5	imm_5_150242335	150242335
5	imm_5_150251315	150251315
5	imm_5_150239113	150239113
5	imm_5_150208191	150208191
5	imm_5_150252410	150252410
5	imm_5_150238300	150238300
2	imm_2_233902126	233902126
5	imm_5_150241500	150241500
5	imm_5_150212138	150212138
5	imm_5_150203930	150203930
5	imm_5_150204572	150204572
5	imm_5_150253046	150253046
11	imm_11_75977297	75977297
2	imm_2_233892432	233892432
5	imm_5_150246279	150246279
5	imm_5_150211143	150211143
5	imm_5_150206832	150206832
5	imm_5_150251946	150251946
5	imm_5_150162903	150162903
5	imm_5_150250613	150250613
5	imm_5_150164746	150164746
5	imm_5_150225903	150225903
5	imm_5_150220269	150220269
5	imm_5_150224466	150224466
5	imm_5_150150036	150150036
5	imm_5_150154751	150154751
5	imm_5_150241098	150241098
5	imm_5_150169480	150169480
5	imm_5_150222006	150222006
5	imm_5_150154488	150154488
5	imm_5_150251978	150251978
5	imm_5_150219664	150219664
5	imm_5_150155152	150155152
5	imm_5_150161792	150161792
11	imm_11_75970221	75970221
5	imm_5_150225322	150225322
5	imm_5_150259411	150259411
5	imm_5_150241557	150241557
5	imm_5_150250485	150250485
2	imm_2_233833690	233833690
5	imm_5_150240025	150240025
5	imm_5_150249525	150249525
5	imm_5_150203708	150203708
5	imm_5_150166118	150166118
5	imm_5_150231573	150231573
11	imm_11_75968802	75968802
5	imm_5_150151752	150151752
5	imm_5_150238675	150238675
5	imm_5_150252814	150252814
5	imm_5_150226732	150226732
5	ccc-5-150209329-A-G	150209329
5	imm_5_158760347	158760347
5	imm_5_150166927	150166927
11	imm_11_75972484	75972484
5	imm_5_150248802	150248802
5	imm_5_158759370	158759370
5	imm_5_131704219	131704219
5	imm_5_158703915	158703915
5	5-40512807-GTT-DELETION	40512807
5	imm_5_131658751	131658751
5	imm_5_131700556	131700556
5	imm_5_131635199	131635199
16	imm_16_49326763	49326763
16	imm_16_49339303	49339303
5	imm_5_150293673	150293673
11	imm_11_75974319	75974319
16	imm_16_49374720	49374720
16	imm_16_49298963	49298963
11	imm_11_75976842	75976842
16	imm_16_49327064	49327064
16	imm_16_49294157	49294157
16	imm_16_49356430	49356430
5	imm_5_131806351	131806351
5	imm_5_131798704	131798704
5	imm_5_131812292	131812292
5	imm_5_131618286	131618286
5	imm_5_150162272	150162272
16	imm_16_49300832	49300832
16	imm_16_49309288	49309288
16	imm_16_49308899	49308899
16	imm_16_49313210	49313210
5	imm_5_131829846	131829846
5	imm_5_158760075	158760075
16	imm_16_49377764	49377764
5	imm_5_131814494	131814494
2	imm_2_233898230	233898230
16	imm_16_49301420	49301420
16	imm_16_49377579	49377579
5	imm_5_150280612	150280612
2	imm_2_233899497	233899497
16	imm_16_49323628	49323628
2	imm_2_233875711	233875711
2	imm_2_233809681	233809681
5	imm_5_131813583	131813583
5	imm_5_131826386	131826386
5	imm_5_158709579	158709579
5	imm_5_131826911	131826911
2	imm_2_233907086	233907086
11	imm_11_75970223	75970223
5	imm_5_131827860	131827860
5	imm_5_131824062	131824062
16	imm_16_49291360	49291360
16	imm_16_49287947	49287947
16	imm_16_49310316	49310316
2	imm_2_233899567	233899567
5	imm_5_150275076	150275076
5	imm_5_158755223	158755223
5	imm_5_158746694	158746694
5	imm_5_131821185	131821185
5	imm_5_158737506	158737506
22	imm_22_37989719	37989719
16	rs9673419	49218774
16	imm_16_49365280	49365280
16	imm_16_49303084	49303084
5	imm_5_150304815	150304815
5	imm_5_150286725	150286725
5	imm_5_158761872	158761872
5	imm_5_150303621	150303621
5	imm_5_158719963	158719963
5	imm_5_150292065	150292065
5	5-40396117-G-INSERTION	40396117
5	imm_5_150252255	150252255
5	imm_5_158760112	158760112
10	imm_10_101273320	101273320
22	imm_22_37990775	37990775
16	imm_16_49310925	49310925
10	imm_10_64093511	64093511
10	imm_10_64091606	64091606
5	imm_5_158754495	158754495
5	imm_5_131839081	131839081
5	imm_5_40417377	40417377
16	imm_16_49348200	49348200
5	5-40418739-G-DELETION	40418739
2	imm_2_233869411	233869411
22	imm_22_37994779	37994779
11	imm_11_75948653	75948653
10	imm_10_64067544	64067544
10	imm_10_64078793	64078793
10	imm_10_64080586	64080586
5	imm_5_40407980	40407980
10	imm_10_64066048	64066048
10	imm_10_64068472	64068472
5	imm_5_40530724	40530724
11	imm_11_75948331	75948331
10	imm_10_64066927	64066927
10	imm_10_64076364	64076364
16	imm_16_49361788	49361788
5	imm_5_158736760	158736760
5	imm_5_40533361	40533361
2	imm_2_233897461	233897461
5	5-40534280-G-INSERTION	40534280
5	imm_5_40386516	40386516
5	imm_5_40531137	40531137
5	imm_5_150155085	150155085
22	imm_22_37995950	37995950
5	imm_5_158752193	158752193
5	imm_5_150213363	150213363
5	imm_5_40532180	40532180
5	imm_5_40534334	40534334
11	rs7927997	75979023
16	imm_16_49400462	49400462
5	imm_5_150233297	150233297
5	imm_5_150209026	150209026
11	imm_11_75978964	75978964
5	imm_5_131761296	131761296
16	imm_16_49398985	49398985
5	imm_5_150224764	150224764
16	imm_16_49366227	49366227
5	imm_5_150154715	150154715
5	imm_5_131759225	131759225
5	imm_5_40532033	40532033
5	imm_5_150224234	150224234
16	rs1990623	49123471
5	imm_5_40532708	40532708
5	5-150226716-CT-INSERTION	150226716
5	imm_5_131753228	131753228
5	imm_5_150157290	150157290
16	imm_16_49325148	49325148
5	imm_5_150219780	150219780
5	imm_5_150229730	150229730
22	imm_22_37992426	37992426
10	imm_10_64061214	64061214
10	imm_10_64060403	64060403
16	imm_16_49325723	49325723
16	imm_16_49251512	49251512
16	imm_16_49317048	49317048
10	imm_10_64058371	64058371
5	imm_5_40345756	40345756
10	imm_10_64061852	64061852
16	imm_16_49322337	49322337
5	imm_5_131754932	131754932
22	imm_22_37993012	37993012
5	imm_5_150209994	150209994
16	imm_16_28430645	28430645
10	imm_10_64057114	64057114
5	imm_5_40332400	40332400
5	imm_5_150309059	150309059
1	imm_1_67442581	67442581
1	rs6656890	67231051
10	imm_10_35511879	35511879
16	imm_16_49309473	49309473
10	imm_10_35382965	35382965
10	imm_10_101276838	101276838
10	imm_10_35480147	35480147
2	imm_2_233875787	233875787
5	imm_5_40330742	40330742
10	imm_10_35399625	35399625
10	imm_10_35512205	35512205
2	imm_2_233864200	233864200
16	imm_16_49317481	49317481
10	imm_10_35446884	35446884
10	imm_10_35466761	35466761
10	imm_10_35470291	35470291
10	imm_10_35469831	35469831
10	imm_10_35337148	35337148
5	imm_5_150165294	150165294
10	imm_10_35499982	35499982
5	imm_5_150152585	150152585
5	imm_5_150164764	150164764
5	imm_5_40325495	40325495
9	imm_9_138383712	138383712
10	imm_10_101279643	101279643
5	imm_5_40630495	40630495
10	imm_10_101274627	101274627
10	imm_10_35456519	35456519
10	imm_10_35340629	35340629
10	imm_10_35321124	35321124
5	imm_5_150165151	150165151
5	imm_5_131815036	131815036
5	imm_5_40351122	40351122
2	imm_2_233835136	233835136
10	imm_10_35514705	35514705
10	imm_10_35501044	35501044
10	imm_10_35402983	35402983
10	imm_10_101274335	101274335
10	imm_10_101279725	101279725
10	imm_10_35451072	35451072
10	imm_10_101274560	101274560
10	imm_10_101277775	101277775
5	imm_5_150165638	150165638
10	imm_10_35514427	35514427
10	imm_10_35494982	35494982
10	imm_10_35400316	35400316
10	imm_10_35466330	35466330
10	imm_10_101274227	101274227
2	imm_2_233831061	233831061
10	imm_10_101273379	101273379
2	imm_2_233831759	233831759
2	imm_2_233838009	233838009
10	imm_10_101277754	101277754
10	imm_10_101273318	101273318
10	imm_10_35399481	35399481
10	imm_10_35349595	35349595
10	imm_10_35391161	35391161
10	imm_10_35335437	35335437
5	imm_5_150162627	150162627
10	imm_10_35446632	35446632
5	imm_5_150169588	150169588
10	imm_10_35406884	35406884
10	imm_10_35383531	35383531
10	imm_10_101283458	101283458
10	imm_10_35449054	35449054
10	imm_10_101276485	101276485
5	imm_5_40368566	40368566
10	imm_10_101282445	101282445
5	imm_5_40366059	40366059
5	imm_5_150166710	150166710
16	imm_16_49349769	49349769
10	imm_10_35418752	35418752
5	imm_5_150166331	150166331
10	imm_10_101283025	101283025
10	imm_10_35409062	35409062
10	imm_10_101275640	101275640
10	imm_10_35387866	35387866
10	imm_10_35372627	35372627
10	imm_10_35410471	35410471
10	imm_10_35430199	35430199
10	imm_10_35474379	35474379
10	imm_10_35409305	35409305
10	imm_10_35345995	35345995
10	imm_10_35478343	35478343
10	imm_10_35472727	35472727
10	imm_10_101281583	101281583
10	imm_10_35349373	35349373
10	imm_10_35449375	35449375
10	imm_10_35513933	35513933
10	imm_10_35410449	35410449
10	imm_10_35346809	35346809
10	imm_10_35389580	35389580
10	imm_10_101281462	101281462
10	imm_10_35407167	35407167
10	imm_10_35532838	35532838
10	imm_10_35481175	35481175
10	imm_10_101283308	101283308
10	imm_10_101276197	101276197
10	imm_10_35451252	35451252
10	imm_10_35438242	35438242
10	imm_10_35363080	35363080
10	imm_10_35375050	35375050
10	imm_10_35363642	35363642
10	imm_10_35439674	35439674
10	imm_10_35519510	35519510
5	imm_5_40359524	40359524
10	imm_10_35512156	35512156
5	imm_5_150167998	150167998
10	imm_10_35486871	35486871
10	imm_10_101283331	101283331
10	imm_10_35327656	35327656
10	imm_10_35364625	35364625
10	imm_10_35496221	35496221
10	imm_10_35372170	35372170
10	imm_10_35507677	35507677
10	imm_10_35325123	35325123
10	imm_10_35458523	35458523
10	imm_10_35552805	35552805
10	imm_10_35464456	35464456
10	imm_10_35421769	35421769
10	imm_10_35455474	35455474
10	imm_10_35551900	35551900
21	imm_21_15728566	15728566
10	imm_10_35384913	35384913
10	imm_10_35328581	35328581
10	imm_10_35429849	35429849
10	imm_10_101282474	101282474
10	imm_10_35481518	35481518
10	imm_10_35362030	35362030
10	imm_10_35421379	35421379
5	imm_5_150267038	150267038
10	imm_10_35553313	35553313
10	imm_10_35506191	35506191
10	imm_10_35366269	35366269
10	imm_10_101276470	101276470
10	imm_10_35374991	35374991
10	imm_10_101278337	101278337
10	imm_10_35349519	35349519
10	imm_10_35427193	35427193
9	imm_9_138391671	138391671
10	imm_10_35433675	35433675
16	imm_16_28421031	28421031
10	imm_10_35485594	35485594
10	imm_10_35539049	35539049
5	imm_5_40638357	40638357
10	imm_10_35557240	35557240
10	imm_10_35311850	35311850
10	imm_10_35505752	35505752
10	imm_10_35416696	35416696
10	imm_10_35475933	35475933
10	imm_10_35360921	35360921
10	imm_10_35538544	35538544
10	imm_10_35542959	35542959
10	imm_10_35521971	35521971
10	imm_10_35343340	35343340
10	imm_10_35524955	35524955
10	imm_10_35405711	35405711
10	imm_10_35417721	35417721
10	imm_10_35384975	35384975
10	imm_10_35402362	35402362
10	imm_10_35455561	35455561
10	imm_10_35426243	35426243
5	imm_5_150168265	150168265
9	imm_9_138386317	138386317
10	imm_10_35320611	35320611
10	imm_10_35317087	35317087
10	imm_10_35318855	35318855
10	imm_10_35505285	35505285
10	imm_10_35451051	35451051
10	imm_10_35557271	35557271
10	imm_10_35462963	35462963
5	imm_5_40614314	40614314
10	imm_10_101272543	101272543
10	imm_10_35505196	35505196
5	imm_5_150258780	150258780
10	imm_10_35391255	35391255
5	imm_5_158698600	158698600
5	imm_5_40636914	40636914
10	imm_10_35371630	35371630
5	imm_5_40359644	40359644
2	imm_2_233828903	233828903
10	imm_10_35519892	35519892
10	imm_10_35412495	35412495
10	imm_10_35360389	35360389
10	imm_10_35533262	35533262
10	imm_10_101280291	101280291
10	imm_10_35393580	35393580
10	imm_10_35538794	35538794
10	imm_10_35525695	35525695
16	imm_16_49397149	49397149
5	imm_5_40549719	40549719
10	imm_10_35327198	35327198
5	imm_5_150280471	150280471
5	imm_5_40542168	40542168
10	10-101272595-A-INSERTION	101272595
6	imm_6_106581442	106581442
9	imm_9_138386226	138386226
16	imm_16_28420904	28420904
10	imm_10_35416775	35416775
10	imm_10_35500945	35500945
5	imm_5_150163256	150163256
9	imm_9_138387354	138387354
10	imm_10_35346212	35346212
5	imm_5_40611596	40611596
5	imm_5_158696755	158696755
21	imm_21_15739809	15739809
21	imm_21_15742759	15742759
2	imm_2_233812782	233812782
9	imm_9_138391879	138391879
21	imm_21_15760443	15760443
10	imm_10_35536874	35536874
5	imm_5_40633070	40633070
9	imm_9_138389019	138389019
10	imm_10_35536736	35536736
5	imm_5_158697056	158697056
10	imm_10_35370583	35370583
2	imm_2_233912941	233912941
9	imm_9_138386518	138386518
16	imm_16_28422355	28422355
5	imm_5_40613525	40613525
9	imm_9_138389159	138389159
10	imm_10_35390422	35390422
21	imm_21_15741820	15741820
5	imm_5_158764855	158764855
9	imm_9_138389304	138389304
2	imm_2_233809622	233809622
9	imm_9_138409646	138409646
9	imm_9_4971602	4971602
5	imm_5_40654222	40654222
10	imm_10_101264048	101264048
2	imm_2_233911003	233911003
16	imm_16_28778692	28778692
5	imm_5_131760355	131760355
21	imm_21_15739182	15739182
5	imm_5_40614679	40614679
5	imm_5_40608200	40608200
5	imm_5_131598795	131598795
5	imm_5_40653159	40653159
10	10-64073436-C-INSERTION	64073436
5	5-40538891-G-INSERTION	40538891
5	imm_5_40604844	40604844
5	imm_5_40550509	40550509
10	imm_10_101272958	101272958
5	imm_5_131756611	131756611
5	imm_5_40540177	40540177
16	imm_16_28446141	28446141
5	imm_5_131601428	131601428
2	imm_2_233914124	233914124
10	imm_10_35391537	35391537
16	imm_16_28438788	28438788
9	imm_9_138396880	138396880
9	imm_9_138388956	138388956
5	imm_5_131628086	131628086
5	imm_5_40543349	40543349
5	imm_5_40587235	40587235
16	imm_16_49399296	49399296
5	imm_5_40658697	40658697
5	imm_5_40597115	40597115
5	imm_5_40605710	40605710
5	imm_5_40538689	40538689
5	imm_5_40545020	40545020
16	imm_16_49304047	49304047
5	imm_5_131624904	131624904
5	imm_5_40543000	40543000
2	imm_2_233859696	233859696
5	imm_5_40566643	40566643
5	ccc-5-40576626-T-C	40576626
10	imm_10_35479828	35479828
5	imm_5_40540105	40540105
16	rs1109863	49249865
5	imm_5_40553088	40553088
5	imm_5_40545764	40545764
10	imm_10_101275862	101275862
5	imm_5_131759203	131759203
16	imm_16_49344648	49344648
5	imm_5_131614497	131614497
5	imm_5_131769595	131769595
5	imm_5_150312674	150312674
21	imm_21_15749436	15749436
10	imm_10_64163228	64163228
5	imm_5_40492989	40492989
3	imm_3_49512843	49512843
5	5-40358888-CT-DELETION	40358888
5	imm_5_150310824	150310824
5	imm_5_131635301	131635301
5	imm_5_131772381	131772381
5	imm_5_40545412	40545412
2	imm_2_233829896	233829896
10	imm_10_35567549	35567549
10	imm_10_101288441	101288441
10	imm_10_64121239	64121239
5	imm_5_150315475	150315475
16	imm_16_28406792	28406792
10	imm_10_64135100	64135100
10	imm_10_64136808	64136808
5	imm_5_40557307	40557307
10	imm_10_64148461	64148461
10	imm_10_101282380	101282380
10	imm_10_64136633	64136633
16	imm_16_49308676	49308676
5	imm_5_40555108	40555108
5	imm_5_40551774	40551774
5	imm_5_131606507	131606507
5	imm_5_131590799	131590799
5	imm_5_40590895	40590895
5	imm_5_40589692	40589692
10	imm_10_64159770	64159770
5	imm_5_131751187	131751187
5	imm_5_131757017	131757017
5	imm_5_40583209	40583209
5	imm_5_40590710	40590710
5	imm_5_40565555	40565555
5	imm_5_40550891	40550891
5	imm_5_40551334	40551334
5	imm_5_40563883	40563883
5	imm_5_40549071	40549071
5	imm_5_40561492	40561492
5	imm_5_131613857	131613857
16	imm_16_49400014	49400014
5	imm_5_40551596	40551596
5	imm_5_40640517	40640517
5	imm_5_40551279	40551279
5	imm_5_131595823	131595823
10	imm_10_64131279	64131279
10	imm_10_35570466	35570466
5	imm_5_40590026	40590026
10	imm_10_64172175	64172175
5	imm_5_40635001	40635001
10	imm_10_64178727	64178727
5	rs11743851	130641499
2	imm_2_233916061	233916061
9	imm_9_138391568	138391568
16	imm_16_28396843	28396843
5	imm_5_131768555	131768555
5	imm_5_40556398	40556398
10	imm_10_64136509	64136509
16	imm_16_28425210	28425210
9	imm_9_5085538	5085538
10	imm_10_64178132	64178132
2	imm_2_233818798	233818798
5	imm_5_131758706	131758706
5	imm_5_131589271	131589271
10	imm_10_64172802	64172802
5	imm_5_131668435	131668435
10	imm_10_35569120	35569120
5	imm_5_131619624	131619624
5	imm_5_131755245	131755245
10	imm_10_64186071	64186071
5	imm_5_131770127	131770127
10	imm_10_64174218	64174218
5	imm_5_131752849	131752849
5	imm_5_131589657	131589657
16	imm_16_28398018	28398018
2	imm_2_102315251	102315251
16	imm_16_28426597	28426597
10	imm_10_64175454	64175454
6	imm_6_106609325	106609325
10	imm_10_64152945	64152945
5	imm_5_40592084	40592084
5	imm_5_131755579	131755579
5	imm_5_131721976	131721976
5	imm_5_40642051	40642051
5	imm_5_131769397	131769397
10	imm_10_64190141	64190141
5	imm_5_131680428	131680428
10	imm_10_64180393	64180393
10	imm_10_64166876	64166876
10	imm_10_101272190	101272190
10	imm_10_64183236	64183236
10	imm_10_64175731	64175731
21	imm_21_15738922	15738922
16	imm_16_28502050	28502050
5	imm_5_131744949	131744949
16	imm_16_28434398	28434398
10	imm_10_64176977	64176977
5	imm_5_131592535	131592535
10	imm_10_64167006	64167006
21	imm_21_15737888	15737888
10	imm_10_101268089	101268089
2	imm_2_102286469	102286469
10	imm_10_101307067	101307067
10	imm_10_101310110	101310110
2	imm_2_233807983	233807983
2	imm_2_102297380	102297380
16	imm_16_28438854	28438854
10	imm_10_101298646	101298646
16	imm_16_28503201	28503201
10	imm_10_64155821	64155821
21	imm_21_15719962	15719962
2	imm_2_102306844	102306844
2	imm_2_102292943	102292943
10	imm_10_64180110	64180110
1	imm_1_199141718	199141718
2	imm_2_102315371	102315371
2	imm_2_102318230	102318230
2	imm_2_102298234	102298234
16	imm_16_28500848	28500848
2	imm_2_102303413	102303413
2	imm_2_102298679	102298679
21	imm_21_15708831	15708831
2	imm_2_102302563	102302563
21	imm_21_15709311	15709311
16	imm_16_28494890	28494890
2	imm_2_102305866	102305866
2	imm_2_102303914	102303914
16	imm_16_28442504	28442504
16	imm_16_28418346	28418346
9	imm_9_138396501	138396501
10	imm_10_64173355	64173355
2	imm_2_102297982	102297982
10	imm_10_64178424	64178424
16	imm_16_28506912	28506912
2	imm_2_102288215	102288215
2	imm_2_233811697	233811697
10	imm_10_101308629	101308629
5	imm_5_131592400	131592400
16	imm_16_28452950	28452950
21	imm_21_15741952	15741952
21	imm_21_15711965	15711965
16	imm_16_28442806	28442806
16	imm_16_28404560	28404560
2	imm_2_102297827	102297827
6	imm_6_106570574	106570574
16	imm_16_28418038	28418038
2	imm_2_102317505	102317505
10	imm_10_101263536	101263536
16	imm_16_49291470	49291470
16	imm_16_49255572	49255572
18	imm_18_12779556	12779556
10	imm_10_101306132	101306132
2	imm_2_102290981	102290981
1	imm_1_199141351	199141351
6	imm_6_106595663	106595663
2	imm_2_102320622	102320622
10	imm_10_101308865	101308865
16	imm_16_28445472	28445472
2	imm_2_102297313	102297313
10	imm_10_80712481	80712481
18	imm_18_12764894	12764894
2	imm_2_60932425	60932425
2	imm_2_102298358	102298358
5	imm_5_131735328	131735328
21	imm_21_15717120	15717120
6	imm_6_106579150	106579150
16	imm_16_28515731	28515731
21	imm_21_15716836	15716836
2	imm_2_102296579	102296579
9	imm_9_138398994	138398994
21	imm_21_15706577	15706577
21	imm_21_15717289	15717289
2	imm_2_102293518	102293518
9	imm_9_138401391	138401391
2	imm_2_102285737	102285737
16	imm_16_28443974	28443974
2	imm_2_102317899	102317899
18	imm_18_12773086	12773086
21	imm_21_15713245	15713245
16	imm_16_28447349	28447349
21	imm_21_15718939	15718939
2	imm_2_102293413	102293413
2	imm_2_102297089	102297089
1	1kg_1_67541181	67541181
21	imm_21_15716626	15716626
16	imm_16_28439689	28439689
16	imm_16_28417894	28417894
21	imm_21_15714916	15714916
10	imm_10_35575701	35575701
21	imm_21_15714723	15714723
2	imm_2_102292752	102292752
2	imm_2_102296812	102296812
2	imm_2_102295444	102295444
2	imm_2_102319499	102319499
21	imm_21_15712124	15712124
21	imm_21_15716855	15716855
10	imm_10_64189305	64189305
18	imm_18_12799340	12799340
2	imm_2_102284220	102284220
16	imm_16_28394557	28394557
6	imm_6_106575179	106575179
21	imm_21_15715761	15715761
21	imm_21_15712949	15712949
21	imm_21_15712084	15712084
10	imm_10_101264555	101264555
16	imm_16_28414373	28414373
21	imm_21_15715910	15715910
2	imm_2_102283666	102283666
21	imm_21_15711550	15711550
21	imm_21_15714181	15714181
5	imm_5_131738298	131738298
1	imm_1_199141865	199141865
5	imm_5_131607932	131607932
1	imm_1_199140852	199140852
21	imm_21_15714557	15714557
21	imm_21_15716376	15716376
2	imm_2_102289419	102289419
18	imm_18_12765591	12765591
2	imm_2_102317494	102317494
21	imm_21_15716450	15716450
5	imm_5_131666223	131666223
2	imm_2_102318404	102318404
16	imm_16_49291534	49291534
1	imm_1_199144473	199144473
5	imm_5_131736776	131736776
16	imm_16_49376613	49376613
21	imm_21_15716232	15716232
16	imm_16_28415549	28415549
10	rs12254167	35594026
2	imm_2_60976477	60976477
2	imm_2_102299984	102299984
18	imm_18_12768715	12768715
6	6-106593685-TCTT-DELETION	106593685
10	imm_10_80716459	80716459
2	imm_2_102454608	102454608
1	imm_1_199145350	199145350
6	imm_6_106578813	106578813
10	imm_10_35378705	35378705
2	imm_2_102433290	102433290
10	imm_10_35440076	35440076
18	imm_18_12767573	12767573
6	imm_6_106555778	106555778
18	imm_18_12772448	12772448
5	imm_5_131616050	131616050
18	imm_18_12769947	12769947
21	imm_21_15712318	15712318
1	imm_1_199144185	199144185
18	imm_18_12869466	12869466
2	imm_2_102301669	102301669
21	imm_21_15705106	15705106
5	imm_5_131594840	131594840
2	imm_2_102452481	102452481
1	imm_1_199142520	199142520
2	imm_2_102455510	102455510
16	imm_16_28245544	28245544
21	imm_21_15706039	15706039
10	imm_10_35528270	35528270
16	imm_16_28248446	28248446
10	imm_10_35581638	35581638
18	imm_18_12769763	12769763
21	imm_21_15713539	15713539
2	imm_2_102441245	102441245
5	imm_5_131605793	131605793
5	imm_5_40363827	40363827
2	imm_2_60971617	60971617
16	imm_16_49296606	49296606
5	imm_5_131608119	131608119
2	imm_2_102454094	102454094
16	imm_16_28754367	28754367
9	imm_9_138380907	138380907
18	imm_18_12853840	12853840
5	imm_5_131605057	131605057
5	imm_5_131614379	131614379
18	imm_18_12854762	12854762
10	imm_10_35580326	35580326
5	imm_5_131612077	131612077
2	imm_2_102443320	102443320
5	imm_5_131605413	131605413
2	imm_2_60985533	60985533
5	imm_5_40659103	40659103
2	imm_2_102453190	102453190
10	imm_10_35581846	35581846
18	imm_18_12862424	12862424
5	imm_5_131604671	131604671
18	imm_18_12845864	12845864
10	imm_10_35582763	35582763
21	imm_21_15728187	15728187
5	imm_5_131608133	131608133
18	imm_18_12876441	12876441
18	imm_18_12875577	12875577
10	imm_10_35581567	35581567
2	imm_2_102443001	102443001
21	imm_21_15755093	15755093
10	imm_10_35581694	35581694
19	1kg_19_1075031	1075031
2	imm_2_60931321	60931321
2	imm_2_102443102	102443102
2	imm_2_61036732	61036732
19	1kg_19_1074378	1074378
2	imm_2_102430944	102430944
10	imm_10_35582144	35582144
16	imm_16_28790742	28790742
22	imm_22_37995864	37995864
16	imm_16_28798966	28798966
16	imm_16_28440572	28440572
10	imm_10_35583920	35583920
6	rs6932542	32488240
1	imm_1_67403578	67403578
10	imm_10_35586135	35586135
6	rs6926737	32483723
18	imm_18_12832480	12832480
18	imm_18_12832567	12832567
5	imm_5_131614458	131614458
5	imm_5_131614248	131614248
10	rs7081597	35586337
21	imm_21_15727547	15727547
10	imm_10_35581988	35581988
18	imm_18_12769342	12769342
18	imm_18_12832681	12832681
9	imm_9_138443132	138443132
5	imm_5_131654011	131654011
9	imm_9_138442324	138442324
10	imm_10_101278228	101278228
21	imm_21_15729620	15729620
19	1kg_19_1122020	1122020
10	imm_10_35591821	35591821
5	imm_5_131616244	131616244
21	imm_21_15728580	15728580
2	imm_2_60972243	60972243
18	imm_18_12833137	12833137
10	imm_10_101285853	101285853
6	rs5007263	32486960
1	imm_1_199202489	199202489
6	rs5007265	32486844
6	rs9268507	32485517
10	imm_10_35581032	35581032
6	rs5007259	32487079
18	imm_18_12782940	12782940
9	imm_9_138436422	138436422
16	imm_16_28415570	28415570
9	rs3812584	138432540
10	imm_10_80713713	80713713
10	imm_10_35588105	35588105
21	imm_21_15721958	15721958
16	imm_16_28458168	28458168
21	imm_21_15732568	15732568
10	imm_10_35588077	35588077
21	imm_21_15723266	15723266
16	imm_16_49380465	49380465
21	imm_21_15732981	15732981
5	imm_5_40660339	40660339
10	imm_10_101278089	101278089
5	imm_5_40390240	40390240
2	imm_2_60958339	60958339
5	imm_5_131862572	131862572
2	imm_2_61038155	61038155
21	imm_21_15720712	15720712
16	imm_16_28821288	28821288
10	imm_10_35589224	35589224
16	imm_16_28490442	28490442
16	imm_16_28453088	28453088
21	imm_21_15734501	15734501
10	imm_10_35589051	35589051
10	imm_10_35591573	35591573
5	rs12651787	158772323
6	rs4502931	32488760
16	imm_16_28501098	28501098
16	imm_16_28415145	28415145
16	imm_16_28763228	28763228
6	rs2524121	31336951
21	imm_21_15734423	15734423
10	imm_10_35587260	35587260
5	imm_5_40416615	40416615
16	imm_16_49295481	49295481
16	imm_16_28473454	28473454
10	imm_10_35589612	35589612
16	imm_16_28782623	28782623
1	imm_1_199148218	199148218
10	imm_10_35589754	35589754
16	imm_16_28761497	28761497
5	imm_5_40398144	40398144
21	imm_21_15736526	15736526
5	imm_5_131603237	131603237
21	imm_21_15723148	15723148
10	imm_10_101277934	101277934
16	imm_16_28461609	28461609
5	imm_5_131824821	131824821
9	imm_9_116608587	116608587
21	imm_21_15733867	15733867
16	imm_16_28496956	28496956
10	imm_10_35585292	35585292
10	imm_10_35301298	35301298
21	imm_21_15734753	15734753
16	imm_16_28467482	28467482
16	imm_16_49377067	49377067
2	imm_2_60981772	60981772
16	imm_16_28473168	28473168
16	imm_16_28752752	28752752
16	imm_16_28477506	28477506
9	imm_9_116608867	116608867
16	imm_16_28473659	28473659
16	imm_16_28762270	28762270
16	imm_16_28788703	28788703
6	6-106590406-T-DELETION	106590406
21	imm_21_15728478	15728478
16	imm_16_28493628	28493628
2	imm_2_60980168	60980168
10	imm_10_101275106	101275106
1	imm_1_67476920	67476920
9	imm_9_4971866	4971866
16	imm_16_28466864	28466864
16	imm_16_28733454	28733454
16	imm_16_28780899	28780899
16	imm_16_28779361	28779361
10	imm_10_35584000	35584000
16	imm_16_28793432	28793432
16	imm_16_28536801	28536801
16	imm_16_49377411	49377411
16	imm_16_28754341	28754341
21	imm_21_15735083	15735083
16	imm_16_28797632	28797632
16	imm_16_49329618	49329618
10	10-101278108-A-DELETION	101278108
5	imm_5_40621996	40621996
21	imm_21_15727091	15727091
5	imm_5_131854221	131854221
10	imm_10_101278925	101278925
16	imm_16_28763023	28763023
18	imm_18_12865975	12865975
16	imm_16_28779490	28779490
16	imm_16_28772543	28772543
18	imm_18_12850934	12850934
6	imm_6_106578202	106578202
16	imm_16_28751866	28751866
5	imm_5_40397093	40397093
21	imm_21_15730091	15730091
16	imm_16_28751785	28751785
16	imm_16_28488186	28488186
6	imm_6_106579963	106579963
5	imm_5_40397491	40397491
16	imm_16_28796987	28796987
18	imm_18_12867060	12867060
16	imm_16_28739883	28739883
16	imm_16_28740598	28740598
18	imm_18_12843458	12843458
21	imm_21_15732265	15732265
10	imm_10_64202601	64202601
18	imm_18_12848610	12848610
10	imm_10_101279988	101279988
16	imm_16_28769235	28769235
16	rs4643314	48933456
1	imm_1_205010591	205010591
10	imm_10_101312413	101312413
21	imm_21_15721689	15721689
16	imm_16_28844760	28844760
21	imm_21_15715175	15715175
16	imm_16_28754650	28754650
16	imm_16_28467074	28467074
1	imm_1_205006527	205006527
16	imm_16_28775305	28775305
18	18-12854978-AA-DELETION	12854978
2	imm_2_61027445	61027445
10	imm_10_101277671	101277671
18	imm_18_12837136	12837136
5	imm_5_40354176	40354176
2	imm_2_60966056	60966056
16	imm_16_28813585	28813585
6	imm_6_106595850	106595850
18	18-12850800-A-INSERTION	12850800
3	imm_3_49671801	49671801
21	imm_21_15711220	15711220
16	imm_16_28806294	28806294
21	imm_21_15720334	15720334
1	imm_1_67373274	67373274
16	imm_16_28488539	28488539
16	imm_16_28825145	28825145
2	imm_2_60987297	60987297
5	imm_5_40395897	40395897
5	imm_5_40413388	40413388
16	imm_16_28767303	28767303
3	imm_3_49680516	49680516
5	rs25887	131443960
6	imm_6_106593985	106593985
5	imm_5_158766945	158766945
5	imm_5_40368840	40368840
16	imm_16_28765146	28765146
9	imm_9_138413080	138413080
21	imm_21_15704954	15704954
18	imm_18_12870206	12870206
3	imm_3_49687301	49687301
3	imm_3_49676987	49676987
6	imm_6_106541962	106541962
1	imm_1_205009036	205009036
5	imm_5_40409631	40409631
16	imm_16_28757872	28757872
2	imm_2_102382648	102382648
5	rs1422878	158771795
10	imm_10_101281357	101281357
5	imm_5_40361415	40361415
22	imm_22_38020737	38020737
5	imm_5_40360992	40360992
5	imm_5_131854312	131854312
16	imm_16_28802631	28802631
6	rs4151651	32023593
3	imm_3_49653311	49653311
9	imm_9_138389726	138389726
9	imm_9_138420368	138420368
5	imm_5_40413099	40413099
5	imm_5_40403112	40403112
6	imm_6_106568528	106568528
6	imm_6_106610385	106610385
16	imm_16_28745407	28745407
5	imm_5_131861498	131861498
5	imm_5_40369508	40369508
22	imm_22_37992496	37992496
5	imm_5_131654510	131654510
3	imm_3_49672463	49672463
9	imm_9_138390927	138390927
5	imm_5_40418185	40418185
5	imm_5_40369429	40369429
3	imm_3_49665500	49665500
3	imm_3_49689229	49689229
5	imm_5_40528991	40528991
16	imm_16_28756169	28756169
22	imm_22_38026584	38026584
5	imm_5_40404651	40404651
5	imm_5_40394195	40394195
16	imm_16_28744704	28744704
6	imm_6_106576763	106576763
2	1kg_2_43566114	43566114
5	imm_5_131549194	131549194
18	imm_18_12811903	12811903
22	imm_22_38027404	38027404
5	imm_5_40594216	40594216
22	imm_22_38000127	38000127
3	imm_3_49694733	49694733
3	imm_3_49696536	49696536
5	imm_5_40660567	40660567
5	imm_5_40396540	40396540
21	imm_21_15763066	15763066
6	rs9279640	32488378
5	imm_5_40383975	40383975
9	imm_9_138391176	138391176
5	imm_5_40397577	40397577
5	imm_5_40411886	40411886
5	imm_5_40354396	40354396
19	1kg_19_1057477	1057477
9	imm_9_138448543	138448543
6	imm_6_106545765	106545765
9	imm_9_116604696	116604696
5	imm_5_40397425	40397425
5	imm_5_40362144	40362144
5	imm_5_40414066	40414066
2	imm_2_61077170	61077170
16	imm_16_28801072	28801072
5	imm_5_40399298	40399298
3	imm_3_49664214	49664214
5	imm_5_40411664	40411664
3	imm_3_49661686	49661686
5	imm_5_40477475	40477475
10	imm_10_64211325	64211325
16	imm_16_28791342	28791342
22	imm_22_38030704	38030704
16	imm_16_28823028	28823028
18	imm_18_12737012	12737012
21	imm_21_44439451	44439451
16	imm_16_28749278	28749278
21	imm_21_44440477	44440477
5	imm_5_40327354	40327354
6	rs438475	32294223
5	imm_5_131581239	131581239
3	imm_3_49677488	49677488
1	imm_1_67474353	67474353
16	imm_16_28833479	28833479
21	imm_21_44441100	44441100
10	imm_10_64220077	64220077
9	imm_9_138389970	138389970
16	imm_16_28732186	28732186
11	imm_11_75959620	75959620
2	rs13407913	24951148
20	imm_20_61799543	61799543
10	imm_10_64211410	64211410
21	imm_21_44440114	44440114
3	imm_3_49653655	49653655
5	imm_5_40404089	40404089
21	imm_21_44440066	44440066
2	imm_2_61017085	61017085
22	imm_22_38049094	38049094
19	1kg_19_1118158	1118158
5	imm_5_131584102	131584102
9	chr9_138379413	138379413
5	imm_5_40419458	40419458
9	imm_9_138390427	138390427
1	imm_1_199153514	199153514
5	imm_5_131580284	131580284
16	imm_16_28746893	28746893
2	imm_2_60995119	60995119
21	imm_21_44438587	44438587
1	imm_1_199156456	199156456
21	imm_21_44440925	44440925
10	imm_10_64194998	64194998
18	imm_18_12813056	12813056
3	imm_3_49657315	49657315
22	imm_22_38048510	38048510
21	imm_21_44439989	44439989
5	imm_5_40324635	40324635
5	imm_5_131564652	131564652
9	9-116611115-GAA-INSERTION	116611115
16	imm_16_28793160	28793160
10	imm_10_101270269	101270269
5	imm_5_131558340	131558340
5	imm_5_40384473	40384473
2	imm_2_61073519	61073519
21	imm_21_44440324	44440324
21	imm_21_44439288	44439288
10	imm_10_80702538	80702538
21	imm_21_44440752	44440752
5	imm_5_131574767	131574767
10	imm_10_101268715	101268715
16	rs1064448	48908384
1	imm_1_205022739	205022739
16	imm_16_49399698	49399698
5	imm_5_131771364	131771364
21	imm_21_44440169	44440169
5	imm_5_40328861	40328861
5	imm_5_131572365	131572365
1	imm_1_199157315	199157315
22	imm_22_38050767	38050767
9	imm_9_138410072	138410072
21	imm_21_44436378	44436378
5	imm_5_40410804	40410804
5	imm_5_158707543	158707543
16	imm_16_49399578	49399578
6	rs206016	32289160
16	imm_16_28515842	28515842
10	imm_10_64096249	64096249
10	imm_10_64191835	64191835
11	imm_11_75953351	75953351
11	imm_11_75960729	75960729
5	imm_5_131562398	131562398
1	imm_1_199223655	199223655
5	imm_5_40424886	40424886
22	imm_22_38000797	38000797
9	imm_9_5075417	5075417
5	imm_5_131841118	131841118
6	rs9264942	31382359
18	imm_18_12844072	12844072
2	imm_2_61032664	61032664
21	imm_21_15763172	15763172
9	imm_9_116598524	116598524
1	imm_1_199157714	199157714
11	imm_11_75896238	75896238
2	imm_2_61043244	61043244
11	imm_11_75951088	75951088
21	imm_21_44438253	44438253
11	imm_11_75957794	75957794
2	imm_2_61031675	61031675
1	imm_1_199206265	199206265
5	imm_5_131563024	131563024
5	imm_5_40382593	40382593
11	imm_11_75963227	75963227
5	imm_5_40392234	40392234
1	imm_1_199148015	199148015
5	imm_5_40346636	40346636
22	imm_22_38056755	38056755
10	imm_10_64160501	64160501
5	imm_5_131565759	131565759
21	imm_21_15763174	15763174
5	imm_5_40384759	40384759
18	imm_18_12751249	12751249
5	imm_5_131562280	131562280
18	18-12752243-A-INSERTION	12752243
18	imm_18_12847335	12847335
2	imm_2_102425669	102425669
5	imm_5_40383016	40383016
1	imm_1_199228910	199228910
1	imm_1_199186985	199186985
19	1kg_19_1057845	1057845
3	imm_3_49572741	49572741
16	imm_16_28534467	28534467
5	imm_5_40411165	40411165
5	imm_5_40385373	40385373
18	imm_18_12735889	12735889
22	imm_22_37996586	37996586
5	imm_5_131552198	131552198
11	imm_11_75951082	75951082
10	imm_10_35555570	35555570
16	imm_16_28829650	28829650
5	imm_5_131569262	131569262
22	imm_22_38068189	38068189
3	imm_3_49609700	49609700
2	imm_2_102429801	102429801
16	imm_16_28851897	28851897
9	imm_9_4990811	4990811
6	rs2524094	31348020
3	imm_3_49594655	49594655
1	imm_1_199217583	199217583
2	imm_2_102418638	102418638
2	imm_2_102426745	102426745
10	imm_10_64178481	64178481
9	imm_9_5055750	5055750
2	imm_2_102305468	102305468
2	imm_2_102270676	102270676
2	imm_2_61079618	61079618
2	rs10182181	25003800
3	imm_3_49565774	49565774
18	imm_18_12845440	12845440
3	imm_3_49572234	49572234
16	imm_16_28776196	28776196
10	imm_10_64158093	64158093
5	imm_5_131513282	131513282
2	imm_2_233908061	233908061
11	imm_11_75950796	75950796
2	imm_2_102426456	102426456
5	imm_5_40383723	40383723
10	rs10883359	101264023
3	imm_3_49466987	49466987
11	imm_11_75956827	75956827
10	imm_10_64164180	64164180
3	imm_3_49522565	49522565
10	imm_10_64158229	64158229
22	imm_22_38055226	38055226
9	imm_9_5073634	5073634
22	imm_22_38035050	38035050
3	imm_3_49619016	49619016
2	imm_2_102417576	102417576
3	imm_3_49649462	49649462
3	imm_3_49640980	49640980
10	imm_10_64156645	64156645
9	imm_9_5060831	5060831
10	imm_10_101264415	101264415
5	imm_5_40383331	40383331
22	imm_22_38065156	38065156
9	imm_9_5010089	5010089
11	imm_11_75958867	75958867
10	imm_10_64161555	64161555
21	imm_21_44441497	44441497
2	imm_2_102423591	102423591
1	imm_1_199230448	199230448
9	imm_9_5073533	5073533
2	imm_2_102411452	102411452
1	imm_1_199226930	199226930
3	imm_3_49429116	49429116
5	imm_5_40410278	40410278
10	imm_10_64168871	64168871
5	imm_5_40402560	40402560
2	rs6752378	25003620
18	imm_18_12742868	12742868
10	imm_10_64157079	64157079
2	imm_2_102416890	102416890
2	imm_2_102458935	102458935
18	imm_18_12741402	12741402
5	imm_5_150361647	150361647
2	imm_2_102375401	102375401
10	imm_10_80704676	80704676
2	imm_2_102428548	102428548
11	imm_11_75955906	75955906
3	imm_3_49586094	49586094
3	imm_3_49513936	49513936
2	imm_2_102417990	102417990
10	rs7097656	82240811
2	imm_2_102422093	102422093
2	imm_2_102444326	102444326
22	imm_22_37995088	37995088
3	imm_3_49371364	49371364
2	imm_2_102458147	102458147
3	imm_3_49370761	49370761
3	imm_3_49619197	49619197
22	imm_22_38067296	38067296
2	imm_2_102421235	102421235
2	imm_2_102429186	102429186
10	imm_10_80730323	80730323
2	imm_2_102448705	102448705
2	imm_2_102435219	102435219
2	imm_2_102453202	102453202
3	imm_3_49425453	49425453
9	imm_9_5068117	5068117
2	imm_2_102427579	102427579
3	imm_3_49650338	49650338
2	imm_2_102449885	102449885
9	imm_9_4988639	4988639
6	rs206015	32290737
10	imm_10_80729341	80729341
3	imm_3_49641968	49641968
5	imm_5_40401588	40401588
2	imm_2_102426732	102426732
3	imm_3_49364846	49364846
19	1kg_19_1078615	1078615
2	imm_2_102421852	102421852
5	imm_5_40396830	40396830
2	imm_2_102446051	102446051
16	imm_16_28470527	28470527
2	imm_2_102417357	102417357
5	imm_5_40477952	40477952
3	imm_3_49500100	49500100
10	imm_10_80717581	80717581
3	imm_3_49429281	49429281
10	imm_10_80715286	80715286
2	imm_2_102446246	102446246
3	imm_3_49428838	49428838
9	imm_9_4955713	4955713
19	1kg_19_1078720	1078720
2	imm_2_102315593	102315593
6	imm_6_106566431	106566431
2	imm_2_102445729	102445729
2	imm_2_102459338	102459338
3	imm_3_49433359	49433359
3	imm_3_49468155	49468155
16	imm_16_28482116	28482116
3	imm_3_49545204	49545204
11	imm_11_75958080	75958080
10	imm_10_64088662	64088662
2	imm_2_102449003	102449003
2	imm_2_233912663	233912663
2	imm_2_102432340	102432340
2	imm_2_102427718	102427718
2	imm_2_102457972	102457972
2	imm_2_102459513	102459513
3	imm_3_49398278	49398278
3	imm_3_49530967	49530967
2	imm_2_102445172	102445172
3	imm_3_49430334	49430334
9	imm_9_138447420	138447420
16	imm_16_28526415	28526415
17	1kg_17_29637245	29637245
5	imm_5_158715801	158715801
1	imm_1_199279560	199279560
2	imm_2_233912849	233912849
2	imm_2_102427283	102427283
2	1kg_2_43526777	43526777
1	imm_1_199256398	199256398
10	imm_10_35561604	35561604
2	imm_2_233912366	233912366
16	imm_16_28539086	28539086
3	imm_3_49547144	49547144
9	imm_9_5064189	5064189
3	imm_3_49624993	49624993
10	imm_10_80737486	80737486
3	imm_3_49438291	49438291
3	imm_3_49500962	49500962
5	imm_5_158706757	158706757
1	imm_1_67512176	67512176
3	imm_3_49445672	49445672
11	imm_11_75856320	75856320
10	imm_10_35375186	35375186
2	imm_2_102298994	102298994
10	imm_10_35516938	35516938
3	imm_3_49639771	49639771
18	imm_18_12753706	12753706
9	imm_9_5063289	5063289
17	1kg_17_29594660	29594660
2	imm_2_102456559	102456559
1	imm_1_199196105	199196105
2	imm_2_102433575	102433575
2	imm_2_102317254	102317254
2	imm_2_102458453	102458453
22	imm_22_38032419	38032419
18	imm_18_12763338	12763338
2	imm_2_102419427	102419427
16	imm_16_28487418	28487418
2	imm_2_102257402	102257402
2	imm_2_102441993	102441993
2	imm_2_102441083	102441083
22	imm_22_38010133	38010133
1	imm_1_199268796	199268796
10	imm_10_64191362	64191362
2	imm_2_102420881	102420881
5	imm_5_158705695	158705695
1	imm_1_199274451	199274451
2	imm_2_102422966	102422966
22	imm_22_37994126	37994126
9	imm_9_5013441	5013441
19	1kg_19_1091914	1091914
10	imm_10_35547059	35547059
17	rs9889296	29594660
2	imm_2_102298258	102298258
9	imm_9_5062798	5062798
10	imm_10_35564974	35564974
17	1kg_17_29641378	29641378
2	imm_2_102454949	102454949
5	imm_5_40356749	40356749
6	rs1052248	31664560
5	imm_5_131836567	131836567
6	rs13207945	32687686
2	imm_2_102361452	102361452
5	imm_5_40399633	40399633
1	imm_1_67476695	67476695
1	imm_1_67510363	67510363
6	rs532098	32686030
2	imm_2_233846332	233846332
5	imm_5_40356915	40356915
10	imm_10_64078373	64078373
5	imm_5_158735664	158735664
2	imm_2_102413312	102413312
2	imm_2_102456110	102456110
5	imm_5_40357941	40357941
2	imm_2_102324148	102324148
2	imm_2_102414234	102414234
1	imm_1_199250112	199250112
9	imm_9_5066613	5066613
10	imm_10_35561388	35561388
10	imm_10_35547170	35547170
3	imm_3_49391829	49391829
2	imm_2_233911109	233911109
1	imm_1_67512991	67512991
17	1kg_17_29597620	29597620
5	imm_5_158702331	158702331
2	imm_2_102457433	102457433
10	imm_10_80704919	80704919
9	imm_9_5006145	5006145
1	imm_1_199281589	199281589
9	imm_9_5006455	5006455
5	5-40351541-A-INSERTION	40351541
1	imm_1_199224320	199224320
22	imm_22_38031043	38031043
5	imm_5_131847820	131847820
1	imm_1_199241738	199241738
22	imm_22_38023464	38023464
22	imm_22_38028861	38028861
2	imm_2_102453815	102453815
1	imm_1_199137377	199137377
2	imm_2_233910964	233910964
9	imm_9_5007384	5007384
2	imm_2_233845377	233845377
9	imm_9_5100899	5100899
10	imm_10_35513919	35513919
10	imm_10_80717348	80717348
10	imm_10_35441227	35441227
22	imm_22_38026780	38026780
9	imm_9_138395115	138395115
5	imm_5_131837204	131837204
9	imm_9_5066691	5066691
5	imm_5_40354887	40354887
10	imm_10_35517908	35517908
10	imm_10_35545536	35545536
2	imm_2_102422528	102422528
10	imm_10_80707806	80707806
6	rs2027856	32510683
5	imm_5_40512592	40512592
5	imm_5_40339974	40339974
21	imm_21_15704686	15704686
2	rs780094	27594741
10	imm_10_80707235	80707235
10	imm_10_35363136	35363136
10	imm_10_35532870	35532870
9	imm_9_4988855	4988855
10	imm_10_80718164	80718164
10	imm_10_35461738	35461738
10	imm_10_64080078	64080078
10	imm_10_35309205	35309205
9	imm_9_138395025	138395025
17	rs7210316	29597620
2	1kg_2_43513474	43513474
2	imm_2_102351856	102351856
5	imm_5_131821968	131821968
19	ccc-19-1131565-C-A	1131565
10	imm_10_35545379	35545379
2	imm_2_61058192	61058192
1	imm_1_205021664	205021664
1	imm_1_199251103	199251103
2	imm_2_102363606	102363606
2	imm_2_102391170	102391170
2	imm_2_61094040	61094040
9	imm_9_5058596	5058596
2	imm_2_233827154	233827154
1	imm_1_199266928	199266928
5	imm_5_131821671	131821671
10	imm_10_35430541	35430541
6	rs9501626	32508322
16	imm_16_28417545	28417545
10	imm_10_64090978	64090978
2	imm_2_102372819	102372819
2	imm_2_102391245	102391245
10	imm_10_35530531	35530531
10	imm_10_35495765	35495765
1	imm_1_67510947	67510947
5	imm_5_40340978	40340978
2	imm_2_102404959	102404959
10	imm_10_35454530	35454530
2	imm_2_102359107	102359107
10	imm_10_80715213	80715213
16	imm_16_28521466	28521466
2	imm_2_102386351	102386351
5	imm_5_40339742	40339742
10	imm_10_80702823	80702823
2	imm_2_102363304	102363304
5	imm_5_158758825	158758825
9	imm_9_5033688	5033688
9	imm_9_5000885	5000885
10	imm_10_80717021	80717021
10	imm_10_80713378	80713378
10	imm_10_35543186	35543186
2	imm_2_102292798	102292798
2	imm_2_102356166	102356166
10	imm_10_35462109	35462109
9	imm_9_116620735	116620735
17	1kg_17_29606120	29606120
2	imm_2_102405019	102405019
5	imm_5_40331170	40331170
22	imm_22_38051691	38051691
17	rs2857656	29606120
10	imm_10_35506385	35506385
2	imm_2_102391635	102391635
10	imm_10_35485858	35485858
9	imm_9_5005143	5005143
5	imm_5_131816233	131816233
10	imm_10_80702891	80702891
5	imm_5_131810736	131810736
19	ccc-19-1137316-G-C	1137316
2	imm_2_102369475	102369475
2	imm_2_102401476	102401476
2	imm_2_102365744	102365744
5	imm_5_131642880	131642880
9	imm_9_4992911	4992911
2	imm_2_102384509	102384509
2	imm_2_61058360	61058360
10	imm_10_80736583	80736583
2	imm_2_102373999	102373999
10	imm_10_35473143	35473143
2	imm_2_102358511	102358511
2	imm_2_102368827	102368827
9	imm_9_5030080	5030080
2	imm_2_102352412	102352412
10	imm_10_80706013	80706013
2	imm_2_102382350	102382350
2	imm_2_102361316	102361316
10	imm_10_35312309	35312309
2	imm_2_102375142	102375142
2	imm_2_102374055	102374055
2	imm_2_233867060	233867060
5	imm_5_40514810	40514810
5	imm_5_40328934	40328934
2	imm_2_102360488	102360488
5	imm_5_40342534	40342534
10	imm_10_35474943	35474943
5	imm_5_40328219	40328219
2	imm_2_102403109	102403109
10	imm_10_35465360	35465360
2	imm_2_102318792	102318792
17	1kg_17_29591792	29591792
5	imm_5_40520250	40520250
2	imm_2_102363237	102363237
2	imm_2_102380734	102380734
19	imm_19_53897920	53897920
9	imm_9_138444395	138444395
22	imm_22_38037791	38037791
1	1kg_1_67675904	67675904
2	imm_2_61040333	61040333
1	imm_1_67414811	67414811
17	1kg_17_29608024	29608024
10	imm_10_80716271	80716271
2	imm_2_102359593	102359593
10	imm_10_80735207	80735207
10	imm_10_35427958	35427958
19	ccc-19-1135155-G-C	1135155
10	imm_10_35440972	35440972
10	imm_10_80735514	80735514
9	imm_9_5061942	5061942
22	imm_22_38041297	38041297
10	imm_10_80718617	80718617
16	imm_16_28539031	28539031
2	imm_2_102377020	102377020
22	imm_22_38037925	38037925
5	imm_5_40348617	40348617
2	imm_2_102361146	102361146
10	imm_10_80713749	80713749
10	imm_10_35326882	35326882
10	imm_10_80730835	80730835
9	imm_9_5007350	5007350
2	imm_2_102291655	102291655
10	imm_10_80737046	80737046
2	imm_2_102406361	102406361
9	imm_9_5062182	5062182
22	imm_22_38042340	38042340
5	imm_5_131853741	131853741
22	imm_22_38038303	38038303
5	imm_5_40331377	40331377
2	imm_2_102381128	102381128
10	imm_10_35454234	35454234
2	imm_2_102322292	102322292
10	imm_10_35397352	35397352
10	imm_10_35409794	35409794
2	imm_2_102390763	102390763
10	imm_10_35564208	35564208
10	imm_10_35430059	35430059
2	imm_2_102367834	102367834
10	imm_10_35385441	35385441
2	imm_2_102322115	102322115
1	imm_1_199139793	199139793
22	imm_22_38006440	38006440
2	imm_2_102323964	102323964
17	1kg_17_29603644	29603644
5	imm_5_131855674	131855674
1	imm_1_199265154	199265154
2	1kg_2_43573195	43573195
10	imm_10_35344914	35344914
5	imm_5_40347657	40347657
5	imm_5_131860413	131860413
9	imm_9_5006818	5006818
19	1kg_19_1123570	1123570
2	imm_2_233851228	233851228
1	imm_1_199138499	199138499
2	imm_2_102379106	102379106
5	imm_5_40532687	40532687
5	imm_5_40342282	40342282
10	imm_10_35422822	35422822
1	1-67430247-A-DELETION	67430247
19	imm_19_53898797	53898797
5	imm_5_40342058	40342058
17	1kg_17_29617778	29617778
17	1kg_17_29603901	29603901
10	imm_10_35410381	35410381
9	imm_9_4956178	4956178
1	imm_1_205015988	205015988
9	imm_9_5085167	5085167
5	imm_5_40348149	40348149
10	imm_10_35367772	35367772
10	imm_10_35331341	35331341
2	imm_2_102380394	102380394
5	imm_5_40338981	40338981
10	imm_10_80713579	80713579
10	imm_10_35377222	35377222
10	imm_10_35379962	35379962
9	imm_9_138447260	138447260
5	imm_5_40342500	40342500
5	imm_5_40517189	40517189
5	imm_5_40493386	40493386
2	imm_2_102442783	102442783
10	imm_10_35339721	35339721
19	imm_19_53899018	53899018
9	imm_9_138443620	138443620
2	imm_2_102364165	102364165
10	imm_10_35381307	35381307
10	imm_10_35513491	35513491
10	imm_10_35339675	35339675
17	1kg_17_29611838	29611838
10	imm_10_64195553	64195553
10	imm_10_35465556	35465556
9	imm_9_5013794	5013794
2	imm_2_102399579	102399579
5	imm_5_40528491	40528491
10	imm_10_35463566	35463566
10	imm_10_64088745	64088745
10	imm_10_35363439	35363439
9	imm_9_116683183	116683183
2	imm_2_102334276	102334276
9	imm_9_5058755	5058755
10	imm_10_35517508	35517508
21	imm_21_15704498	15704498
5	imm_5_40348108	40348108
16	rs1528602	49556702
9	imm_9_138376968	138376968
2	imm_2_102338297	102338297
5	imm_5_40346589	40346589
9	imm_9_138404958	138404958
10	imm_10_35360361	35360361
19	imm_19_53897984	53897984
2	imm_2_233864276	233864276
9	imm_9_5097278	5097278
9	imm_9_138379170	138379170
11	imm_11_75921347	75921347
2	imm_2_233872567	233872567
11	imm_11_75839037	75839037
10	imm_10_64184117	64184117
1	imm_1_199228506	199228506
10	imm_10_35412740	35412740
17	1kg_17_29616109	29616109
19	imm_19_53899069	53899069
9	imm_9_138399597	138399597
2	rs10469840	102459675
17	1kg_17_29617018	29617018
2	imm_2_102343969	102343969
2	imm_2_102351116	102351116
2	imm_2_102452063	102452063
9	imm_9_5012807	5012807
11	imm_11_75934863	75934863
16	imm_16_28524558	28524558
17	1kg_17_29624677	29624677
11	imm_11_75929466	75929466
10	imm_10_35307771	35307771
11	imm_11_75917769	75917769
9	imm_9_5013604	5013604
22	imm_22_38006690	38006690
5	imm_5_131831436	131831436
5	imm_5_131788630	131788630
5	imm_5_131645223	131645223
9	imm_9_5104773	5104773
11	imm_11_75832494	75832494
9	imm_9_5039092	5039092
10	imm_10_35383503	35383503
10	imm_10_35327424	35327424
11	imm_11_75857195	75857195
1	imm_1_67428874	67428874
11	imm_11_75945125	75945125
9	imm_9_5058520	5058520
9	imm_9_138421404	138421404
2	imm_2_61141837	61141837
17	1kg_17_29588863	29588863
5	imm_5_131811112	131811112
17	1kg_17_29653409	29653409
5	imm_5_131810343	131810343
9	imm_9_138447690	138447690
9	imm_9_5104522	5104522
11	imm_11_75864316	75864316
2	imm_2_102340561	102340561
5	imm_5_131807854	131807854
5	imm_5_131809580	131809580
5	imm_5_40560617	40560617
11	imm_11_75944979	75944979
2	imm_2_102341768	102341768
9	imm_9_5000091	5000091
9	imm_9_5083465	5083465
9	imm_9_5104523	5104523
16	imm_16_28522235	28522235
10	imm_10_35509981	35509981
9	imm_9_5046037	5046037
19	rs602662	53898797
5	imm_5_131807756	131807756
2	imm_2_233869338	233869338
5	imm_5_131807659	131807659
5	imm_5_131806312	131806312
16	imm_16_28512187	28512187
9	imm_9_5052610	5052610
9	imm_9_4998070	4998070
2	imm_2_61413584	61413584
[truncated: 766 more rows]
