# Supplementary material for: Multiple Epistasis Interactions Within MHC Are Associated With Ulcerative Colitis
Source: Front Genet. 2019 Apr 3;10:257. doi: 10.3389/fgene.2019.00257 (PMC6456704; doi:10.3389/fgene.2019.00257)
Supplement: Supplementary file 2 [file Data_Sheet_1.ZIP › Supplemental_Data/CD_Discovery_Independent_306_SNPs.csv]

CHR	SNP	BP
1	imm_1_67480743	67480743
1	imm_1_67452578	67452578
16	imm_16_49288597	49288597
1	imm_1_67475114	67475114
16	imm_16_49290875	49290875
1	1-67452531-T-INSERTION	67452531
1	imm_1_67437798	67437798
1	imm_1_67458031	67458031
16	imm_16_49314041	49314041
1	imm_1_67436742	67436742
1	imm_1_67459652	67459652
1	imm_1_67525259	67525259
2	imm_2_233825084	233825084
2	imm_2_233849691	233849691
1	imm_1_67537186	67537186
2	imm_2_233810357	233810357
1	imm_1_67533953	67533953
1	imm_1_67431391	67431391
5	5-40525152-A-DELETION	40525152
5	imm_5_40432182	40432182
1	imm_1_67397897	67397897
5	imm_5_40493541	40493541
5	imm_5_40472455	40472455
5	imm_5_40492385	40492385
5	imm_5_40503029	40503029
5	imm_5_40492409	40492409
5	imm_5_40494445	40494445
5	imm_5_40513272	40513272
1	imm_1_67384201	67384201
5	imm_5_40518283	40518283
10	imm_10_64115570	64115570
5	imm_5_150222006	150222006
5	imm_5_150166927	150166927
5	imm_5_158703915	158703915
16	imm_16_49326763	49326763
16	imm_16_49298963	49298963
5	imm_5_150162272	150162272
16	imm_16_49301420	49301420
5	imm_5_150280612	150280612
16	imm_16_49323628	49323628
2	imm_2_233809681	233809681
11	imm_11_75970223	75970223
5	imm_5_131827860	131827860
16	rs9673419	49218774
5	imm_5_158761872	158761872
5	imm_5_150303621	150303621
5	imm_5_150252255	150252255
10	imm_10_101273320	101273320
5	imm_5_158752193	158752193
16	rs1990623	49123471
16	imm_16_49325148	49325148
16	imm_16_49322337	49322337
16	imm_16_28430645	28430645
5	imm_5_150309059	150309059
1	rs6656890	67231051
16	imm_16_49309473	49309473
10	imm_10_35382965	35382965
10	imm_10_35399625	35399625
9	imm_9_138383712	138383712
10	imm_10_35449054	35449054
10	imm_10_35387866	35387866
10	imm_10_35349373	35349373
21	imm_21_15728566	15728566
10	imm_10_35451051	35451051
10	imm_10_101272543	101272543
5	imm_5_158698600	158698600
2	imm_2_233828903	233828903
5	imm_5_150280471	150280471
5	imm_5_40542168	40542168
10	imm_10_35416775	35416775
5	imm_5_158697056	158697056
10	imm_10_35390422	35390422
9	imm_9_4971602	4971602
16	imm_16_28778692	28778692
5	imm_5_131598795	131598795
10	imm_10_101272958	101272958
5	imm_5_40492989	40492989
3	imm_3_49512843	49512843
16	imm_16_49308676	49308676
5	imm_5_131751187	131751187
10	imm_10_64131279	64131279
2	imm_2_233916061	233916061
16	imm_16_28396843	28396843
5	imm_5_131768555	131768555
5	imm_5_40556398	40556398
9	imm_9_5085538	5085538
5	imm_5_131619624	131619624
5	imm_5_131769397	131769397
10	imm_10_64155821	64155821
21	imm_21_15708831	15708831
21	imm_21_15741952	15741952
21	imm_21_15711965	15711965
1	imm_1_199141351	199141351
6	imm_6_106595663	106595663
6	imm_6_106579150	106579150
2	imm_2_102293413	102293413
6	imm_6_106575179	106575179
10	imm_10_101264555	101264555
16	imm_16_28414373	28414373
2	imm_2_60976477	60976477
2	imm_2_102454608	102454608
10	imm_10_35378705	35378705
5	imm_5_131616050	131616050
2	imm_2_102301669	102301669
21	imm_21_15706039	15706039
10	imm_10_35528270	35528270
10	imm_10_35581638	35581638
2	imm_2_60971617	60971617
5	imm_5_131605057	131605057
2	imm_2_60985533	60985533
5	imm_5_131604671	131604671
10	imm_10_35582763	35582763
5	imm_5_131608133	131608133
10	imm_10_35581567	35581567
16	imm_16_28790742	28790742
5	imm_5_131614458	131614458
19	1kg_19_1122020	1122020
2	imm_2_60972243	60972243
1	imm_1_199202489	199202489
9	imm_9_138436422	138436422
5	imm_5_131862572	131862572
16	imm_16_28821288	28821288
16	imm_16_28501098	28501098
16	imm_16_28415145	28415145
6	rs2524121	31336951
2	imm_2_60981772	60981772
16	imm_16_28493628	28493628
16	imm_16_28536801	28536801
16	imm_16_49377411	49377411
21	imm_21_15735083	15735083
16	imm_16_28751785	28751785
16	imm_16_28488186	28488186
16	rs4643314	48933456
16	imm_16_28488539	28488539
5	imm_5_40413388	40413388
16	imm_16_28802631	28802631
6	rs4151651	32023593
3	imm_3_49653311	49653311
5	imm_5_131861498	131861498
22	imm_22_37992496	37992496
6	imm_6_106576763	106576763
2	1kg_2_43566114	43566114
22	imm_22_38027404	38027404
5	imm_5_40594216	40594216
22	imm_22_38000127	38000127
6	rs9279640	32488378
3	imm_3_49661686	49661686
1	imm_1_67474353	67474353
21	imm_21_44441100	44441100
2	rs13407913	24951148
5	imm_5_40404089	40404089
9	chr9_138379413	138379413
3	imm_3_49657315	49657315
10	imm_10_64191835	64191835
1	imm_1_199223655	199223655
9	imm_9_5075417	5075417
6	rs9264942	31382359
2	imm_2_61032664	61032664
11	imm_11_75896238	75896238
2	imm_2_61043244	61043244
2	imm_2_61031675	61031675
2	imm_2_102425669	102425669
16	imm_16_28829650	28829650
2	imm_2_102418638	102418638
9	imm_9_5055750	5055750
2	imm_2_102305468	102305468
2	imm_2_61079618	61079618
10	imm_10_64158093	64158093
3	imm_3_49466987	49466987
11	imm_11_75956827	75956827
2	imm_2_102417576	102417576
5	imm_5_40402560	40402560
2	imm_2_102375401	102375401
10	rs7097656	82240811
3	imm_3_49371364	49371364
3	imm_3_49545204	49545204
16	imm_16_28526415	28526415
17	1kg_17_29637245	29637245
2	1kg_2_43526777	43526777
11	imm_11_75856320	75856320
3	imm_3_49639771	49639771
2	imm_2_102419427	102419427
2	imm_2_102441083	102441083
10	imm_10_64191362	64191362
9	imm_9_5013441	5013441
2	imm_2_102361452	102361452
9	imm_9_5007384	5007384
10	imm_10_35441227	35441227
5	imm_5_40512592	40512592
2	rs780094	27594741
10	imm_10_80718164	80718164
2	imm_2_61094040	61094040
10	imm_10_35430541	35430541
2	imm_2_102359107	102359107
17	rs2857656	29606120
5	imm_5_131810736	131810736
2	imm_2_102365744	102365744
2	imm_2_102358511	102358511
19	imm_19_53897920	53897920
16	imm_16_28539031	28539031
9	imm_9_5007350	5007350
1	imm_1_199265154	199265154
2	1kg_2_43573195	43573195
19	1kg_19_1123570	1123570
5	imm_5_40532687	40532687
1	imm_1_205015988	205015988
5	imm_5_40338981	40338981
9	imm_9_138447260	138447260
10	imm_10_35339721	35339721
10	imm_10_35463566	35463566
10	imm_10_64088745	64088745
9	imm_9_116683183	116683183
21	imm_21_15704498	15704498
16	rs1528602	49556702
10	imm_10_35360361	35360361
19	imm_19_53897984	53897984
17	1kg_17_29616109	29616109
10	imm_10_35307771	35307771
9	imm_9_5013604	5013604
11	imm_11_75832494	75832494
11	imm_11_75864316	75864316
9	imm_9_5083465	5083465
10	imm_10_35509981	35509981
2	imm_2_61190320	61190320
2	imm_2_61106919	61106919
3	imm_3_49279333	49279333
6	rs9264842	31378986
10	imm_10_35307872	35307872
10	imm_10_64192120	64192120
2	rs12998521	102340849
8	rs6651252	129636363
9	imm_9_5120363	5120363
10	imm_10_35382093	35382093
2	imm_2_61045499	61045499
6	rs9264902	31380485
9	imm_9_5099707	5099707
17	rs10775412	22893160
2	1kg_2_43607250	43607250
2	1kg_2_43542868	43542868
1	imm_1_67409858	67409858
5	imm_5_40412687	40412687
2	1kg_2_43565027	43565027
21	rs2284553	33698565
6	rs2244027	31455545
9	imm_9_5084034	5084034
10	imm_10_35588231	35588231
9	imm_9_138435503	138435503
6	rs1819788	31367116
17	1kg_17_29664138	29664138
18	imm_18_12877750	12877750
2	imm_2_61534497	61534497
6	rs6928482	32734227
10	imm_10_35567030	35567030
12	imm_12_38855065	38855065
9	imm_9_5119395	5119395
1	imm_1_67432484	67432484
1	1kg_1_159738782	159738782
17	1kg_17_29659666	29659666
2	1kg_2_43537389	43537389
6	imm_6_106637023	106637023
6	6-106578719-A-INSERTION	106578719
9	imm_9_116578155	116578155
6	rs9265198	31397689
5	rs10057047	130175466
21	imm_21_44463112	44463112
1	imm_1_199279220	199279220
6	rs2229094	31648535
5	imm_5_158756752	158756752
2	imm_2_61123426	61123426
5	imm_5_40568372	40568372
5	imm_5_40555978	40555978
6	rs2524074	31352000
5	imm_5_131747595	131747595
2	imm_2_61450416	61450416
6	rs2524142	31371501
10	imm_10_35569053	35569053
1	imm_1_67384804	67384804
9	imm_9_5167533	5167533
3	imm_3_49341745	49341745
6	rs2844623	31340522
2	imm_2_233921588	233921588
6	rs1264524	30512765
1	imm_1_199217930	199217930
2	rs1545255	24592914
21	imm_21_44448564	44448564
10	imm_10_35586020	35586020
1	imm_1_67421048	67421048
5	imm_5_131566162	131566162
5	imm_5_40424207	40424207
5	imm_5_158756364	158756364
2	imm_2_233921265	233921265
5	imm_5_40624131	40624131
9	imm_9_116600781	116600781
5	5-40592352-T-DELETION	40592352
10	1kg_10_59684652	59684652
6	rs2524151	31369938
22	imm_22_38013480	38013480
9	imm_9_5085095	5085095
2	1kg_2_43575458	43575458
2	imm_2_61191691	61191691
5	imm_5_40658755	40658755
16	chr16_49308343	49308343
17	1kg_17_29605365	29605365
12	imm_12_38878895	38878895
12	imm_12_39044919	39044919
6	rs6929408	31408628
