# Supplementary material for: Multiple Epistasis Interactions Within MHC Are Associated With Ulcerative Colitis
Source: Front Genet. 2019 Apr 3;10:257. doi: 10.3389/fgene.2019.00257 (PMC6456704; doi:10.3389/fgene.2019.00257)
Supplement: Supplementary file 2 [file Data_Sheet_1.ZIP › Supplemental_Data/UC_Discovery_1123_SNPs.csv]

CHR	SNP	BP
6	rs13207945	32687686
6	rs532098	32686030
6	rs9271209	32687013
6	rs9271255	32688335
6	rs9271100	32684456
6	rs482044	32684042
6	rs2097431	32698811
6	rs9272363	32712563
1	imm_1_20038558	20038558
1	imm_1_20044447	20044447
6	rs9271366	32694832
1	imm_1_20044101	20044101
6	rs2239802	32519824
6	rs3129868	32512355
6	rs2395182	32521295
6	rs3763311	32484154
6	rs9270986	32682038
6	rs1964995	32557389
6	rs389883	32055439
6	rs9269081	32549078
6	rs9269110	32551247
6	rs3130286	32150300
6	rs6923504	32536164
6	rs6903608	32536263
6	rs9272353	32712434
6	rs9271775	32702306
6	rs419788	32036778
1	imm_1_20100310	20100310
6	rs3104413	32690628
6	rs9271640	32700178
6	rs6931277	32691335
6	rs3129768	32703061
6	rs440454	32035321
1	imm_1_67503956	67503956
1	imm_1_67480743	67480743
1	imm_1_67512759	67512759
1	imm_1_67508536	67508536
6	rs9268406	32450107
6	rs9268475	32466209
6	rs3817962	32476292
6	rs3763307	32482600
6	rs9268516	32487467
6	rs9268403	32449451
6	rs9268474	32465143
6	rs2076525	32478594
6	rs9268401	32449296
6	rs8180664	32455468
6	rs9268456	32457924
6	rs9268480	32471822
6	rs2076522	32479157
6	rs9268459	32458754
6	rs9268457	32458014
6	rs9268481	32472334
6	rs9268428	32452951
21	imm_21_39385153	39385153
6	rs9268482	32475755
21	imm_21_39388169	39388169
1	imm_1_67507948	67507948
6	rs3998159	32789997
21	imm_21_39388338	39388338
21	imm_21_39387382	39387382
21	imm_21_39388440	39388440
21	imm_21_39387771	39387771
21	imm_21_39388614	39388614
20	imm_20_42498442	42498442
6	rs9275334	32775085
6	rs9275532	32783612
21	imm_21_39387404	39387404
6	rs9275205	32765538
6	rs9275530	32783501
6	rs521539	32689951
6	rs9275495	32781552
6	rs3957146	32789508
1	imm_1_67498692	67498692
6	rs660895	32685358
6	rs2294880	32475700
21	imm_21_39380592	39380592
21	imm_21_39382729	39382729
6	rs3806157	32481779
21	imm_21_39380964	39380964
1	imm_1_20074500	20074500
1	imm_1_67475114	67475114
6	rs7454108	32789461
1	imm_1_20073577	20073577
1	imm_1_20067289	20067289
1	imm_1_20067269	20067269
1	imm_1_20071524	20071524
21	imm_21_39387048	39387048
6	rs9268497	32483402
6	rs4947342	32761048
6	rs9275599	32790407
6	rs9268494	32483330
21	imm_21_39381402	39381402
6	rs3021061	32759817
21	imm_21_39388109	39388109
6	rs1048709	32022914
6	rs4151651	32023593
6	rs3130342	32188124
6	rs9275338	32775321
6	rs3129888	32519704
1	imm_1_205009036	205009036
1	imm_1_20046445	20046445
1	imm_1_20036455	20036455
6	rs9275330	32774853
1	imm_1_20089447	20089447
1	imm_1_20036027	20036027
6	rs3130283	32246523
1	imm_1_20086552	20086552
1	imm_1_67469657	67469657
6	rs3134603	32233980
1	imm_1_20078005	20078005
21	imm_21_39390708	39390708
6	rs3135391	32518965
1	imm_1_205010591	205010591
1	imm_1_205006527	205006527
6	rs9268499	32483673
6	rs3129889	32521523
21	imm_21_39389293	39389293
6	rs3134954	32179871
6	rs3130279	32220604
6	rs9268614	32510756
6	rs3129948	32462622
12	imm_12_66794389	66794389
6	rs3117098	32466491
6	rs3129954	32473558
1	1kg_1_159746369	159746369
6	rs3130287	32158522
6	rs630379	32030233
6	rs3129961	32486918
6	rs3129955	32473818
6	rs3117182	32174797
6	rs2395163	32495787
3	imm_3_49512843	49512843
12	imm_12_66790103	66790103
6	rs9276189	32807303
12	imm_12_66790769	66790769
12	imm_12_66794543	66794543
12	imm_12_66789272	66789272
12	imm_12_66791307	66791307
12	imm_12_66785221	66785221
3	imm_3_49696536	49696536
12	imm_12_66787129	66787129
12	imm_12_66785758	66785758
12	imm_12_66787721	66787721
12	imm_12_66787520	66787520
12	imm_12_66786342	66786342
12	imm_12_66769526	66769526
12	imm_12_66772854	66772854
12	imm_12_66786253	66786253
1	rs1801274	159746369
12	imm_12_66788772	66788772
12	imm_12_66777049	66777049
6	rs9275614	32792235
12	imm_12_66788377	66788377
12	imm_12_66765480	66765480
6	rs3916765	32793528
12	imm_12_66779247	66779247
12	imm_12_66789419	66789419
3	imm_3_49676987	49676987
3	imm_3_49672463	49672463
1	1kg_1_159737129	159737129
3	imm_3_49665500	49665500
3	imm_3_49687301	49687301
3	imm_3_49680516	49680516
1	1kg_1_159736666	159736666
12	imm_12_66793360	66793360
3	imm_3_49650338	49650338
3	imm_3_49661686	49661686
3	imm_3_49664214	49664214
6	rs9267992	32328375
1	imm_1_20045543	20045543
3	imm_3_49677488	49677488
3	imm_3_49671801	49671801
3	imm_3_49653311	49653311
3	imm_3_49653655	49653655
1	imm_1_20045623	20045623
3	imm_3_49619016	49619016
3	imm_3_49689229	49689229
3	imm_3_49694733	49694733
12	imm_12_66793406	66793406
12	imm_12_66793735	66793735
3	imm_3_49641968	49641968
3	imm_3_49649462	49649462
1	imm_1_67458186	67458186
3	imm_3_49657315	49657315
3	imm_3_49619197	49619197
3	imm_3_49640980	49640980
1	imm_1_20110930	20110930
6	rs6931646	32517759
6	rs3132946	32298006
3	imm_3_49639771	49639771
6	rs1053924	32228693
3	imm_3_49624993	49624993
6	rs9267955	32321128
6	rs3129886	32518554
6	rs6911419	32517765
12	imm_12_66790296	66790296
6	rs2239804	32519501
1	imm_1_67497708	67497708
1	imm_1_67495155	67495155
6	rs9268658	32518694
1	imm_1_67467986	67467986
6	rs3817966	32475825
6	rs3817963	32476065
6	rs9276610	32850073
6	rs411326	32319295
1	imm_1_67469135	67469135
12	imm_12_66785504	66785504
12	imm_12_66790187	66790187
1	rs2201841	67466790
12	imm_12_66790859	66790859
6	rs3806156	32481676
12	imm_12_66786905	66786905
12	imm_12_66789157	66789157
12	imm_12_66788592	66788592
12	imm_12_66789421	66789421
1	1-67468820-ATT-DELETION	67468820
3	imm_3_49572741	49572741
12	imm_12_66784937	66784937
12	imm_12_66787546	66787546
12	imm_12_66786506	66786506
12	imm_12_66786791	66786791
3	imm_3_49565774	49565774
3	imm_3_49522565	49522565
6	rs2076523	32478813
6	rs1044506	32280043
6	rs3117119	32426588
3	imm_3_49594655	49594655
3	imm_3_49609700	49609700
6	rs3131294	32288124
6	rs3132940	32269374
3	imm_3_49586094	49586094
1	imm_1_67445353	67445353
1	imm_1_67448316	67448316
6	rs592229	32038420
3	imm_3_49500100	49500100
3	imm_3_49547144	49547144
10	imm_10_101273320	101273320
6	rs7197	32520558
6	rs3132963	32428131
3	imm_3_49513936	49513936
6	rs10484563	32811140
12	imm_12_66788536	66788536
6	rs3129938	32444473
6	rs2395253	32823138
1	imm_1_67490116	67490116
12	imm_12_66784143	66784143
12	imm_12_66773584	66773584
6	rs9268543	32492779
12	imm_12_66772251	66772251
3	imm_3_49545204	49545204
3	imm_3_49371364	49371364
3	imm_3_49370761	49370761
3	imm_3_49468155	49468155
3	imm_3_49530967	49530967
3	imm_3_49428838	49428838
1	imm_1_67448104	67448104
12	imm_12_66784252	66784252
3	imm_3_49364846	49364846
10	imm_10_101272958	101272958
3	imm_3_49500962	49500962
3	imm_3_49391829	49391829
3	imm_3_49429116	49429116
3	imm_3_49425453	49425453
3	imm_3_49445672	49445672
6	rs537160	32024379
1	imm_1_67442801	67442801
3	imm_3_49438291	49438291
6	rs9268832	32535767
3	imm_3_49430334	49430334
1	rs3806308	20015453
10	imm_10_101273379	101273379
6	rs9279640	32488378
3	imm_3_49398278	49398278
3	imm_3_49572234	49572234
10	imm_10_101275862	101275862
6	rs5024431	32792322
6	rs12614	32022158
3	imm_3_49433359	49433359
3	imm_3_49429281	49429281
6	rs7757475	32832477
6	rs6936863	32792007
1	imm_1_67493685	67493685
10	imm_10_101274627	101274627
10	imm_10_101274227	101274227
10	imm_10_101274560	101274560
10	imm_10_101273318	101273318
10	imm_10_101274335	101274335
6	rs9268103	32353348
6	rs3131003	31201461
6	rs6928482	32734227
10	imm_10_101276470	101276470
3	imm_3_49279333	49279333
10	imm_10_101282474	101282474
1	1kg_1_159738782	159738782
10	imm_10_101280291	101280291
10	imm_10_101276485	101276485
6	rs9268148	32367505
10	imm_10_101279725	101279725
10	imm_10_101279643	101279643
1	imm_1_205021664	205021664
10	imm_10_101276838	101276838
10	imm_10_101277754	101277754
10	imm_10_101277775	101277775
10	imm_10_101275640	101275640
6	rs3095302	31201045
2	imm_2_61058421	61058421
10	imm_10_101282445	101282445
10	imm_10_101272543	101272543
10	imm_10_101283331	101283331
10	imm_10_101276197	101276197
1	imm_1_67503216	67503216
6	rs9268521	32489352
6	rs3095301	31201335
10	imm_10_101283308	101283308
6	rs3094204	31199971
10	imm_10_101281583	101281583
10	imm_10_101281462	101281462
10	imm_10_101283025	101283025
6	rs3131283	32227876
10	imm_10_101278337	101278337
10	10-101272595-A-INSERTION	101272595
6	rs1800684	32259972
1	imm_1_199251103	199251103
1	imm_1_199279560	199279560
10	imm_10_101264048	101264048
6	rs9267845	32301676
6	rs3096691	32302832
6	rs2857208	32851081
6	rs1475961	32302587
6	rs3793127	32479893
1	imm_1_205022739	205022739
1	imm_1_199274451	199274451
3	imm_3_49466987	49466987
10	imm_10_101283458	101283458
1	imm_1_199230448	199230448
2	imm_2_61071046	61071046
2	imm_2_61058360	61058360
1	imm_1_199281589	199281589
6	rs9268831	32535726
1	imm_1_199250112	199250112
1	imm_1_199285682	199285682
1	imm_1_199256398	199256398
1	imm_1_199228910	199228910
1	imm_1_199223655	199223655
2	imm_2_61058192	61058192
6	rs7754768	32528157
2	imm_2_61040333	61040333
6	rs6935940	32791669
1	imm_1_199266928	199266928
1	imm_1_199241738	199241738
6	rs2213586	32521072
6	rs2227139	32521437
12	imm_12_66756325	66756325
6	rs2213585	32521128
6	rs17495592	32466511
6	rs3817969	32469366
1	imm_1_199279220	199279220
6	rs3763327	32521808
1	imm_1_199202489	199202489
1	imm_1_199206265	199206265
6	rs3763312	32484326
1	imm_1_199217583	199217583
2	imm_2_61069669	61069669
1	imm_1_199265154	199265154
6	rs7195	32520517
6	rs3096695	32177784
1	imm_1_199268796	199268796
1	imm_1_20058083	20058083
1	imm_1_205015988	205015988
1	imm_1_67491717	67491717
1	imm_1_20044471	20044471
6	rs7192	32519624
7	imm_7_107267362	107267362
1	imm_1_67502643	67502643
6	rs3104402	32789654
1	imm_1_199224320	199224320
10	imm_10_101268089	101268089
7	imm_7_107289698	107289698
6	rs204999	32217957
1	imm_1_20052789	20052789
1	imm_1_199286983	199286983
2	1kg_2_241219064	241219064
10	imm_10_101282380	101282380
1	1-67452531-T-INSERTION	67452531
2	1kg_2_241219409	241219409
7	imm_7_107287483	107287483
10	imm_10_101272190	101272190
1	imm_1_199140852	199140852
6	rs1061808	32244525
10	imm_10_101288441	101288441
6	rs2294881	32475582
1	imm_1_20039928	20039928
12	imm_12_66755909	66755909
1	imm_1_20049985	20049985
6	rs9501161	32032306
1	imm_1_199145350	199145350
1	imm_1_199141865	199141865
6	rs2294883	32475429
1	imm_1_199287197	199287197
7	imm_7_107264149	107264149
1	imm_1_199141718	199141718
1	imm_1_199144185	199144185
1	imm_1_199226930	199226930
2	imm_2_61045499	61045499
6	rs7767167	32873160
6	rs6926737	32483723
6	rs2294882	32475493
1	imm_1_199287350	199287350
1	imm_1_199144473	199144473
10	imm_10_101263536	101263536
2	imm_2_61084518	61084518
1	imm_1_20060988	20060988
12	rs4913395	66756752
6	rs9268507	32485517
7	imm_7_107303945	107303945
1	imm_1_199142520	199142520
1	imm_1_199153514	199153514
6	rs5007265	32486844
6	rs5007263	32486960
1	imm_1_20074876	20074876
6	rs2518027	31544455
1	imm_1_199196105	199196105
10	imm_10_101264555	101264555
6	rs5007259	32487079
1	imm_1_205061348	205061348
6	rs2244578	31544588
6	rs9263717	31204505
10	imm_10_101298646	101298646
10	imm_10_101307067	101307067
6	rs2596446	31548174
1	imm_1_20053992	20053992
6	rs4502931	32488760
6	rs6932542	32488240
7	imm_7_107299731	107299731
1	imm_1_199157315	199157315
1	imm_1_199156456	199156456
1	imm_1_20056775	20056775
6	rs2523671	31545297
10	imm_10_101308629	101308629
1	imm_1_20075093	20075093
7	imm_7_107299846	107299846
1	imm_1_20058279	20058279
10	imm_10_101308865	101308865
1	imm_1_67525259	67525259
1	imm_1_199157714	199157714
1	imm_1_20053754	20053754
6	rs439303	32316899
1	imm_1_20045850	20045850
10	imm_10_101310110	101310110
2	rs2564114	61084151
6	rs28366191	32472168
1	imm_1_199290682	199290682
1	imm_1_20058178	20058178
1	imm_1_199290603	199290603
1	imm_1_20073278	20073278
7	imm_7_107287366	107287366
1	imm_1_199148218	199148218
7	imm_7_107296509	107296509
1	imm_1_20076221	20076221
1	imm_1_20061243	20061243
7	imm_7_107302536	107302536
7	imm_7_107288149	107288149
6	rs2596449	31546369
7	imm_7_107287183	107287183
7	imm_7_107287232	107287232
7	imm_7_107302760	107302760
1	imm_1_20064023	20064023
7	imm_7_107297017	107297017
1	imm_1_20074940	20074940
1	imm_1_199141351	199141351
10	imm_10_101306132	101306132
1	imm_1_67520024	67520024
2	imm_2_61051294	61051294
2	1kg_2_241216635	241216635
6	rs2844507	31544560
1	imm_1_67507887	67507887
1	imm_1_67512680	67512680
6	rs3130983	31192771
6	rs3132554	31192142
1	imm_1_67507070	67507070
6	rs7738430	31616815
6	rs3094214	31193361
1	imm_1_199186985	199186985
2	rs4335944	241225299
7	imm_7_107287733	107287733
6	rs3094219	31191265
6	rs1042147	31191135
1	imm_1_67408078	67408078
6	rs1042134	31191643
6	rs3130555	31193526
6	rs1042145	31191307
6	rs1042126	31192267
6	rs2076531	32471690
6	rs3891175	32742445
6	rs3094217	31191635
1	ccc-1-67517272-T-C	67517272
6	rs3763315	32484632
6	rs1042141	31191445
6	rs241428	32912048
1	imm_1_67518356	67518356
10	imm_10_101285853	101285853
1	imm_1_67368960	67368960
6	rs3104405	32790286
6	rs443198	32298384
6	rs2076528	32472172
9	imm_9_5085538	5085538
3	imm_3_48976413	48976413
1	imm_1_199272125	199272125
9	imm_9_138383712	138383712
7	rs4380874	107267551
6	rs28366174	32374468
10	imm_10_101278089	101278089
7	imm_7_107282567	107282567
9	imm_9_138391568	138391568
1	imm_1_199272808	199272808
6	rs3130982	31192054
6	rs769177	31655590
3	imm_3_48721243	48721243
1	imm_1_199195767	199195767
10	imm_10_101275106	101275106
6	rs9405035	32515046
1	imm_1_20116995	20116995
6	rs28366175	32377556
6	rs396960	32299559
6	rs3134929	32300085
1	imm_1_199150169	199150169
1	imm_1_199148015	199148015
7	imm_7_107278560	107278560
7	rs886774	107282670
6	rs479536	32301656
7	imm_7_107283274	107283274
9	imm_9_4971602	4971602
6	rs6911777	32517974
1	imm_1_20116420	20116420
3	imm_3_49788262	49788262
10	10-101278108-A-DELETION	101278108
7	imm_7_107282381	107282381
1	imm_1_67395886	67395886
9	imm_9_138391879	138391879
6	rs4530903	32689867
6	rs13211318	32210658
9	imm_9_138386518	138386518
6	rs12153855	32182782
12	imm_12_66759602	66759602
10	imm_10_101281357	101281357
6	rs2076535	32447489
10	imm_10_101278925	101278925
6	rs2072633	32027557
7	imm_7_107280834	107280834
1	imm_1_67523062	67523062
10	imm_10_101277671	101277671
10	imm_10_101277934	101277934
10	imm_10_101312413	101312413
1	imm_1_67429272	67429272
3	imm_3_49304094	49304094
3	imm_3_49270029	49270029
6	rs3819721	32912776
7	imm_7_107265463	107265463
6	rs9391734	32205961
3	imm_3_49288982	49288982
7	imm_7_107287722	107287722
20	imm_20_61799543	61799543
3	imm_3_49285412	49285412
10	imm_10_101279988	101279988
3	imm_3_48695307	48695307
1	imm_1_67462196	67462196
1	imm_1_20059168	20059168
3	imm_3_49203647	49203647
9	imm_9_138391671	138391671
7	imm_7_107287571	107287571
7	imm_7_107295236	107295236
7	imm_7_107265600	107265600
3	imm_3_49284688	49284688
11	1kg_11_113892040	113892040
10	imm_10_101270269	101270269
3	imm_3_49182853	49182853
3	imm_3_49288517	49288517
3	imm_3_49220081	49220081
2	imm_2_61077763	61077763
3	imm_3_49266887	49266887
1	imm_1_20061547	20061547
11	1kg_11_113935144	113935144
11	1kg_11_113893166	113893166
11	1kg_11_113935257	113935257
7	imm_7_107287796	107287796
11	1kg_11_113898862	113898862
3	imm_3_49204461	49204461
1	imm_1_20058237	20058237
11	1kg_11_113935620	113935620
9	imm_9_138389019	138389019
3	imm_3_49170445	49170445
1	imm_1_20085334	20085334
3	imm_3_49334947	49334947
1	imm_1_20061045	20061045
9	imm_9_138386317	138386317
3	rs9847839	49264007
7	imm_7_107290677	107290677
6	rs2857105	32898037
7	imm_7_107264106	107264106
11	1kg_11_113936764	113936764
3	imm_3_49284538	49284538
1	imm_1_67537186	67537186
2	1kg_2_241227781	241227781
1	imm_1_67458031	67458031
3	imm_3_48771822	48771822
1	imm_1_67380688	67380688
3	imm_3_49188034	49188034
2	rs4676401	241234257
3	imm_3_49318179	49318179
7	imm_7_107289377	107289377
3	imm_3_49341745	49341745
11	1kg_11_113918656	113918656
5	imm_5_158760347	158760347
6	rs1265098	31214156
3	imm_3_49301182	49301182
10	imm_10_101264415	101264415
5	imm_5_158761872	158761872
2	1kg_2_241233427	241233427
12	imm_12_66760362	66760362
9	imm_9_138389304	138389304
10	rs10883359	101264023
6	rs3130683	31996346
11	1kg_11_113935819	113935819
3	imm_3_49297031	49297031
6	rs9263701	31202133
1	imm_1_199217930	199217930
1	imm_1_205018827	205018827
9	imm_9_138389159	138389159
11	1kg_11_113946458	113946458
6	rs2395166	32496253
3	imm_3_49348049	49348049
9	imm_9_138386226	138386226
10	imm_10_101278228	101278228
6	rs3815087	31201566
3	imm_3_49337373	49337373
6	rs9263699	31201678
9	imm_9_138387354	138387354
6	rs6932435	31203264
3	imm_3_49357929	49357929
7	imm_7_107347147	107347147
11	1kg_11_113946333	113946333
7	imm_7_107291568	107291568
2	rs6745185	241235633
6	rs9263703	31202461
3	imm_3_49333650	49333650
7	imm_7_107289907	107289907
10	imm_10_101268715	101268715
21	imm_21_39391390	39391390
7	imm_7_107288230	107288230
6	rs3830135	32656442
11	imm_11_75977297	75977297
11	1kg_11_113933993	113933993
1	imm_1_67519611	67519611
2	1kg_2_241235702	241235702
9	imm_9_138388956	138388956
3	imm_3_49153994	49153994
3	rs34580506	49088717
11	imm_11_75970221	75970221
3	imm_3_49190970	49190970
11	1kg_11_113947153	113947153
1	imm_1_199239077	199239077
5	imm_5_158759617	158759617
9	imm_9_138396880	138396880
1	imm_1_67459652	67459652
6	rs9267658	31953964
5	imm_5_158759370	158759370
6	rs9263715	31203780
3	imm_3_49114410	49114410
1	imm_1_199290059	199290059
11	imm_11_75970223	75970223
1	imm_1_20083688	20083688
2	rs4676405	241227842
3	imm_3_49116120	49116120
7	imm_7_107282453	107282453
6	rs9272105	32707977
3	imm_3_49220205	49220205
1	imm_1_205032782	205032782
2	rs6724516	241235483
3	rs35283189	49088672
11	imm_11_75968802	75968802
12	imm_12_66755546	66755546
6	rs8283	32191278
6	rs9267873	32307330
3	imm_3_49230507	49230507
7	imm_7_107337182	107337182
3	imm_3_48936730	48936730
3	imm_3_49131477	49131477
6	rs9267853	32303229
7	imm_7_107312968	107312968
6	rs2515920	31670594
6	rs9268515	32487273
6	rs3096702	32300309
12	imm_12_66784073	66784073
7	imm_7_107338995	107338995
7	imm_7_107314591	107314591
9	imm_9_138380907	138380907
5	imm_5_158760075	158760075
2	rs4676407	241227210
7	imm_7_107317722	107317722
6	rs9272143	32708781
9	imm_9_138409646	138409646
3	imm_3_48890325	48890325
7	imm_7_107306959	107306959
7	imm_7_107323781	107323781
2	rs6437356	241240317
3	imm_3_49030792	49030792
3	imm_3_48808619	48808619
12	imm_12_66756724	66756724
3	imm_3_49852589	49852589
9	imm_9_116604696	116604696
6	rs2859110	32806115
6	rs3132542	31199142
6	rs2859063	32800838
7	imm_7_107264676	107264676
5	imm_5_158764855	158764855
3	imm_3_48796040	48796040
3	imm_3_49039114	49039114
3	imm_3_48745736	48745736
9	imm_9_116608587	116608587
2	1kg_2_241229123	241229123
6	rs3095310	31199426
7	imm_7_107329898	107329898
5	imm_5_158760112	158760112
6	rs374205	32304851
7	imm_7_107319326	107319326
1	imm_1_67460937	67460937
7	imm_7_107307232	107307232
1	imm_1_20082056	20082056
7	imm_7_107310103	107310103
1	imm_1_67465610	67465610
6	rs3130501	31244432
7	imm_7_107353724	107353724
6	rs6904669	31300775
6	rs2859099	32807493
6	rs12663103	32269302
6	rs2073723	31238057
16	imm_16_28778692	28778692
1	imm_1_199228506	199228506
6	rs17207986	32187545
6	rs2073721	31237595
7	imm_7_107351602	107351602
6	rs3130999	31199176
7	imm_7_107350822	107350822
7	imm_7_107338244	107338244
6	rs3132528	31239548
7	imm_7_107346373	107346373
6	rs3130502	31244645
6	rs2858880	32812862
6	rs17533167	32698822
7	imm_7_107322472	107322472
10	imm_10_64115570	64115570
3	imm_3_49724980	49724980
7	imm_7_107327480	107327480
6	rs3131000	31199252
7	imm_7_107353666	107353666
1	imm_1_199152956	199152956
7	imm_7_107327641	107327641
11	1kg_11_113937280	113937280
2	rs1864879	241230124
9	imm_9_116608867	116608867
6	rs2269423	32253685
7	imm_7_107318515	107318515
7	imm_7_107362398	107362398
7	imm_7_107325739	107325739
7	imm_7_107332822	107332822
9	imm_9_116598524	116598524
7	imm_7_107333035	107333035
7	imm_7_107315338	107315338
1	1kg_1_159757967	159757967
2	imm_2_61043244	61043244
9	chr9_138379413	138379413
6	rs429150	32183541
7	imm_7_107342415	107342415
7	imm_7_107331767	107331767
6	rs3130997	31198837
3	imm_3_49019717	49019717
6	rs3097659	33124011
9	imm_9_5006455	5006455
7	imm_7_107313250	107313250
3	imm_3_49572059	49572059
3	imm_3_49318605	49318605
7	imm_7_107347887	107347887
6	rs3134939	32277599
3	imm_3_48728153	48728153
3	imm_3_49289964	49289964
3	imm_3_49877548	49877548
7	imm_7_107348628	107348628
6	rs1065461	31238481
7	imm_7_107356753	107356753
7	imm_7_107331444	107331444
7	imm_7_107348391	107348391
11	imm_11_75948331	75948331
7	imm_7_107321368	107321368
9	imm_9_5006145	5006145
7	imm_7_107347918	107347918
6	rs3130071	31702607
6	rs6907458	32279266
3	imm_3_49679991	49679991
6	rs2071277	32279661
6	rs763469	33112365
6	rs9267576	31920017
1	imm_1_199154280	199154280
7	imm_7_107331978	107331978
6	rs1265115	31225054
5	imm_5_158761867	158761867
6	rs9268199	32386613
7	imm_7_107283063	107283063
3	imm_3_48727658	48727658
3	imm_3_49660077	49660077
6	rs3132131	33007463
7	imm_7_107347427	107347427
9	imm_9_5010089	5010089
1	imm_1_199241687	199241687
3	imm_3_49624075	49624075
1	imm_1_20081370	20081370
7	imm_7_107362020	107362020
3	imm_3_48729881	48729881
7	imm_7_107264708	107264708
9	imm_9_138396501	138396501
9	imm_9_138401391	138401391
6	rs34878747	32160876
9	imm_9_5007384	5007384
5	imm_5_158759071	158759071
1	imm_1_20084257	20084257
1	1kg_1_159777157	159777157
6	rs6921236	32685910
3	imm_3_48731516	48731516
3	imm_3_49652296	49652296
6	rs2022084	31225032
3	imm_3_49686318	49686318
6	rs2240059	31228593
3	imm_3_49650146	49650146
3	imm_3_49695397	49695397
6	rs2076530	32471794
1	imm_1_199159466	199159466
11	imm_11_75948653	75948653
3	imm_3_48719564	48719564
3	imm_3_49899428	49899428
7	imm_7_107366910	107366910
3	imm_3_49247222	49247222
7	imm_7_107362793	107362793
3	imm_3_48791729	48791729
6	rs3130604	33093030
3	imm_3_49606589	49606589
6	rs436388	32294242
1	imm_1_199158760	199158760
7	imm_7_107351775	107351775
7	imm_7_107266955	107266955
13	1kg_13_26423790	26423790
6	rs3130607	33095255
12	rs11177081	66856562
1	imm_1_67533953	67533953
6	rs130078	31226544
3	imm_3_49182097	49182097
3	imm_3_49683506	49683506
6	rs6916278	31786753
5	imm_5_158758825	158758825
1	1kg_1_159769473	159769473
3	imm_3_48715284	48715284
6	rs6930777	32459544
1	imm_1_20083820	20083820
3	imm_3_49911914	49911914
3	imm_3_49681742	49681742
3	imm_3_49631793	49631793
3	imm_3_48720171	48720171
3	imm_3_48707227	48707227
3	imm_3_48926644	48926644
12	rs12317232	66865390
3	imm_3_48700018	48700018
12	rs11177083	66857812
9	imm_9_138398994	138398994
12	rs11177099	66877451
12	rs10878784	66876775
7	imm_7_107369172	107369172
3	imm_3_48707484	48707484
3	imm_3_49679733	49679733
1	imm_1_199219438	199219438
3	imm_3_49627160	49627160
3	imm_3_48713682	48713682
1	imm_1_20084195	20084195
3	imm_3_49679081	49679081
7	imm_7_107370477	107370477
3	imm_3_49882115	49882115
12	rs7969592	66865916
3	imm_3_49727376	49727376
3	imm_3_48710710	48710710
9	imm_9_5055750	5055750
1	imm_1_205031575	205031575
12	rs12301088	66876215
1	imm_1_199151869	199151869
6	rs2523897	31101937
3	imm_3_49924838	49924838
3	imm_3_49690450	49690450
1	imm_1_199151870	199151870
11	rs678170	113937166
13	1kg_13_26424265	26424265
7	imm_7_107278114	107278114
6	rs28732193	32414900
12	rs10492197	66871874
3	imm_3_48724362	48724362
6	rs2844508	31544478
1	imm_1_205029039	205029039
3	imm_3_49873277	49873277
12	rs2870950	66870973
6	rs6916062	32327019
3	imm_3_49818727	49818727
6	rs3130603	33088586
6	rs2071287	32278411
3	imm_3_49873004	49873004
1	imm_1_67520728	67520728
6	rs3892710	32790840
1	imm_1_20111447	20111447
7	imm_7_107352374	107352374
1	imm_1_199231201	199231201
11	1kg_11_113829182	113829182
1	imm_1_67525941	67525941
2	1kg_2_199207688	199207688
9	imm_9_4971866	4971866
6	rs28732201	32458432
1	imm_1_199232224	199232224
6	rs28366155	31766613
6	rs929138	31611677
3	imm_3_49872834	49872834
5	imm_5_158496785	158496785
1	imm_1_199266977	199266977
1	imm_1_199231339	199231339
1	imm_1_199230960	199230960
3	imm_3_49671637	49671637
3	imm_3_49765686	49765686
1	imm_1_199230905	199230905
6	rs915894	32298368
1	imm_1_199231753	199231753
3	imm_3_49899944	49899944
3	rs13434258	48713495
9	imm_9_5054193	5054193
6	rs3129304	33081721
1	imm_1_67526096	67526096
3	imm_3_49911106	49911106
1	rs4845604	150068304
1	imm_1_199220186	199220186
3	imm_3_49794106	49794106
3	imm_3_49914591	49914591
7	imm_7_107370862	107370862
16	imm_16_28790742	28790742
6	rs151723	33003337
16	imm_16_28767303	28767303
12	imm_12_66780095	66780095
6	rs241423	32925988
12	imm_12_66764425	66764425
6	rs151724	33000666
16	imm_16_28754367	28754367
3	imm_3_49720192	49720192
3	imm_3_49738342	49738342
3	imm_3_49767027	49767027
9	imm_9_4988639	4988639
16	imm_16_28394557	28394557
16	imm_16_28798966	28798966
12	imm_12_66773366	66773366
1	imm_1_199292473	199292473
9	imm_9_5064189	5064189
6	rs34555781	32033676
3	imm_3_49913231	49913231
9	imm_9_5062798	5062798
6	rs3129303	33081856
12	imm_12_66773727	66773727
16	imm_16_28438788	28438788
3	imm_3_49782089	49782089
3	imm_3_49759781	49759781
3	imm_3_49711569	49711569
6	rs492899	32041497
4	rs10010325	106325802
3	imm_3_49763973	49763973
3	imm_3_49714090	49714090
16	imm_16_28746893	28746893
9	imm_9_138391176	138391176
3	imm_3_49765548	49765548
9	imm_9_5073533	5073533
3	imm_3_48876175	48876175
3	imm_3_49719396	49719396
1	imm_1_199195398	199195398
3	imm_3_49885088	49885088
22	imm_22_37990775	37990775
1	imm_1_199272429	199272429
3	imm_3_49857353	49857353
6	rs241436	32905854
3	imm_3_49767162	49767162
22	imm_22_37989719	37989719
3	imm_3_49723837	49723837
3	imm_3_49719894	49719894
12	rs2193046	66821052
2	rs6732874	241237588
9	imm_9_4990811	4990811
6	rs7774434	32765556
1	imm_1_199198928	199198928
3	imm_3_49807265	49807265
12	imm_12_66782344	66782344
1	imm_1_199256064	199256064
3	imm_3_49748240	49748240
1	imm_1_204933010	204933010
3	imm_3_49983122	49983122
9	imm_9_5006818	5006818
6	rs7356880	32509305
16	imm_16_28757872	28757872
3	imm_3_49725192	49725192
12	rs2069727	66834490
9	imm_9_4992911	4992911
6	rs9366769	31277268
16	imm_16_28756169	28756169
1	imm_1_199276179	199276179
3	imm_3_49720681	49720681
3	imm_3_49817629	49817629
3	imm_3_49676302	49676302
9	imm_9_138389726	138389726
2	1kg_2_199314605	199314605
1	imm_1_67454257	67454257
3	imm_3_49727431	49727431
7	rs6974491	37341035
2	1kg_2_199289759	199289759
1	imm_1_205026839	205026839
9	imm_9_5007350	5007350
6	rs2853950	31344154
16	imm_16_28248446	28248446
6	rs2395153	32453573
9	imm_9_5068117	5068117
3	imm_3_49728007	49728007
2	1kg_2_199310170	199310170
6	rs2844509	31618903
6	rs4122189	31275906
6	rs2524142	31371501
16	imm_16_28754650	28754650
1	imm_1_2472781	2472781
16	imm_16_28752752	28752752
3	imm_3_50078921	50078921
16	imm_16_28801072	28801072
16	imm_16_28779361	28779361
12	rs7969024	66865170
3	imm_3_49856138	49856138
16	imm_16_28763228	28763228
16	imm_16_28404560	28404560
1	imm_1_67523781	67523781
1	1kg_1_159913431	159913431
16	imm_16_28740598	28740598
1	imm_1_67521656	67521656
9	9-116611115-GAA-INSERTION	116611115
6	rs2516498	31573878
9	imm_9_116578155	116578155
6	rs2247056	31373469
16	imm_16_28775305	28775305
16	imm_16_28732186	28732186
16	imm_16_28791342	28791342
16	imm_16_28782623	28782623
16	imm_16_28772543	28772543
12	rs10878786	66877192
16	imm_16_28769235	28769235
16	imm_16_28763023	28763023
2	1kg_2_199292424	199292424
1	imm_1_67443356	67443356
16	imm_16_28749278	28749278
7	imm_7_107280025	107280025
6	rs204995	32262263
16	imm_16_28780899	28780899
3	imm_3_49901617	49901617
16	imm_16_28398018	28398018
16	imm_16_28754341	28754341
9	imm_9_5058755	5058755
16	imm_16_28779490	28779490
3	imm_3_49760137	49760137
9	imm_9_5073634	5073634
16	imm_16_28762270	28762270
6	rs2267647	33083489
3	imm_3_49874799	49874799
2	1kg_2_199279995	199279995
6	rs2524054	31360375
6	rs9267948	32320211
12	imm_12_66792539	66792539
1	imm_1_199278447	199278447
16	imm_16_28788703	28788703
6	rs2106074	31241488
16	imm_16_28751866	28751866
7	1kg_7_37355338	37355338
6	rs3130934	31236531
11	1kg_11_113890195	113890195
11	imm_11_75972484	75972484
16	imm_16_28793160	28793160
16	imm_16_28751785	28751785
2	imm_2_61024549	61024549
1	imm_1_199200219	199200219
12	imm_12_66760649	66760649
3	imm_3_49843459	49843459
7	1kg_7_37339704	37339704
9	imm_9_5046037	5046037
12	imm_12_66760421	66760421
3	imm_3_49865617	49865617
9	imm_9_5013441	5013441
2	1kg_2_241218365	241218365
1	imm_1_205029260	205029260
7	1kg_7_37339139	37339139
3	imm_3_49175141	49175141
9	imm_9_5045434	5045434
5	imm_5_158758935	158758935
21	imm_21_39401951	39401951
3	imm_3_49844162	49844162
6	rs474534	32046086
9	imm_9_5066613	5066613
6	rs2516440	31548476
1	rs11578418	150059608
16	imm_16_28797632	28797632
6	rs2853928	31365490
2	1kg_2_199302383	199302383
1	imm_1_20065463	20065463
3	imm_3_49844635	49844635
16	imm_16_28796987	28796987
1	imm_1_67442721	67442721
3	imm_3_49788017	49788017
1	imm_1_205034003	205034003
16	imm_16_28793432	28793432
9	imm_9_5075417	5075417
16	imm_16_28823028	28823028
22	imm_22_38006440	38006440
16	imm_16_28821288	28821288
6	rs2394882	31240628
1	imm_1_205035516	205035516
