# Supplementary material for: Multiple Epistasis Interactions Within MHC Are Associated With Ulcerative Colitis
Source: Front Genet. 2019 Apr 3;10:257. doi: 10.3389/fgene.2019.00257 (PMC6456704; doi:10.3389/fgene.2019.00257)
Supplement: Supplementary file 2 [file Data_Sheet_1.ZIP › Supplemental_Data/UC_Discovery_Independent_121_SNPs.csv]

CHR	SNP	BP
6	rs9271209	32687013
6	rs482044	32684042
6	rs3763311	32484154
6	rs3130286	32150300
6	rs9271640	32700178
1	imm_1_67480743	67480743
6	rs3998159	32789997
20	imm_20_42498442	42498442
6	rs4151651	32023593
6	rs3130342	32188124
6	rs9268499	32483673
6	rs3129948	32462622
6	rs3117098	32466491
1	1kg_1_159746369	159746369
6	rs3117182	32174797
3	imm_3_49512843	49512843
3	imm_3_49696536	49696536
1	rs1801274	159746369
3	imm_3_49672463	49672463
3	imm_3_49639771	49639771
12	imm_12_66790296	66790296
1	1-67468820-ATT-DELETION	67468820
3	imm_3_49522565	49522565
12	imm_12_66788536	66788536
6	rs9268543	32492779
6	rs9268832	32535767
1	rs3806308	20015453
6	rs9279640	32488378
1	imm_1_67493685	67493685
10	imm_10_101274627	101274627
6	rs6928482	32734227
3	imm_3_49279333	49279333
10	imm_10_101272543	101272543
10	imm_10_101264048	101264048
1	imm_1_199281589	199281589
1	imm_1_199250112	199250112
6	rs3763312	32484326
1	imm_1_205015988	205015988
7	imm_7_107289698	107289698
1	1-67452531-T-INSERTION	67452531
6	rs1061808	32244525
1	imm_1_20060988	20060988
10	imm_10_101307067	101307067
1	imm_1_67525259	67525259
1	imm_1_20061243	20061243
1	imm_1_67507887	67507887
1	imm_1_67368960	67368960
9	imm_9_5085538	5085538
9	imm_9_138391568	138391568
3	imm_3_48721243	48721243
1	imm_1_199150169	199150169
9	imm_9_4971602	4971602
3	imm_3_49788262	49788262
1	imm_1_67523062	67523062
20	imm_20_61799543	61799543
10	imm_10_101279988	101279988
3	imm_3_48695307	48695307
7	imm_7_107295236	107295236
3	imm_3_49170445	49170445
1	imm_1_67537186	67537186
2	rs4676401	241234257
3	imm_3_49318179	49318179
11	1kg_11_113935819	113935819
1	imm_1_199217930	199217930
1	imm_1_67519611	67519611
3	imm_3_49153994	49153994
3	imm_3_49190970	49190970
6	rs9263715	31203780
1	imm_1_199290059	199290059
1	imm_1_20083688	20083688
1	imm_1_205032782	205032782
6	rs9267873	32307330
6	rs9267853	32303229
6	rs3096702	32300309
3	imm_3_49852589	49852589
7	imm_7_107329898	107329898
1	imm_1_20082056	20082056
6	rs6904669	31300775
16	imm_16_28778692	28778692
1	imm_1_199228506	199228506
6	rs17207986	32187545
7	imm_7_107346373	107346373
6	rs17533167	32698822
10	imm_10_64115570	64115570
2	rs1864879	241230124
6	rs2269423	32253685
2	imm_2_61043244	61043244
9	chr9_138379413	138379413
6	rs3130997	31198837
7	imm_7_107313250	107313250
7	imm_7_107347918	107347918
6	rs9268199	32386613
3	imm_3_49660077	49660077
1	imm_1_67533953	67533953
6	rs130078	31226544
3	imm_3_49911914	49911914
3	imm_3_49631793	49631793
1	imm_1_199219438	199219438
3	imm_3_49873277	49873277
6	rs929138	31611677
5	imm_5_158496785	158496785
9	imm_9_5054193	5054193
1	rs4845604	150068304
16	imm_16_28790742	28790742
16	imm_16_28798966	28798966
4	rs10010325	106325802
6	rs7774434	32765556
3	imm_3_49725192	49725192
3	imm_3_49676302	49676302
3	imm_3_49727431	49727431
16	imm_16_28248446	28248446
6	rs2844509	31618903
1	imm_1_2472781	2472781
1	1kg_1_159913431	159913431
6	rs9267948	32320211
16	imm_16_28751785	28751785
2	1kg_2_241218365	241218365
9	imm_9_5045434	5045434
6	rs474534	32046086
1	rs11578418	150059608
22	imm_22_38006440	38006440
